1 Evaluation and rational design of guide RNAs for efficient CRISPR/Cas9-  
2 mediated mutagenesis in *Ciona*

3  
4 Shashank Gandhi<sup>1,3</sup>, Maximilian Haeussler<sup>2</sup>, Florian Razy-Krajka<sup>1</sup>, Lionel Christiaen<sup>1\*</sup> and  
5 Alberto Stolfi<sup>1\*</sup>

6  
7  
8 <sup>1</sup> Department of Biology, New York University, New York, USA. <sup>2</sup> Santa Cruz Genomics  
9 Institute, MS CBSE, University of California, Santa Cruz, USA. <sup>3</sup> Current address: Division of  
10 Biology and Biological Engineering, California Institute of Technology, Pasadena, California,  
11 USA

12  
13 \* corresponding authors: lc121@nyu.edu (L.C.), stolfidobranchia@gmail.com (A.S.)

14  
15  
16 **Key words**

17 *sgRNA, cardiopharyngeal mesoderm, tunicate*

18 **Abstract**

19  
20  
21 The CRISPR/Cas9 system has emerged as an important tool for various genome engineering  
22 applications. A current obstacle to high throughput applications of CRISPR/Cas9 is the  
23 imprecise prediction of highly active single guide RNAs (sgRNAs). We previously implemented  
24 the CRISPR/Cas9 system to induce tissue-specific mutations in the tunicate *Ciona*. In the present  
25 study, we designed and tested 83 single guide RNA (sgRNA) vectors targeting 23 genes  
26 expressed in the cardiopharyngeal progenitors and surrounding tissues of *Ciona* embryo. Using  
27 high-throughput sequencing of mutagenized alleles, we identified guide sequences that correlate  
28 with sgRNA mutagenesis activity and used this information for the rational design of all possible  
29 sgRNAs targeting the *Ciona* transcriptome. We also describe a one-step cloning-free protocol for  
30 the assembly of sgRNA expression cassettes. These cassettes can be directly electroporated as  
31 unpurified PCR products into *Ciona* embryos for sgRNA expression *in vivo*, resulting in high  
32 frequency of CRISPR/Cas9-mediated mutagenesis in somatic cells of electroporated embryos.  
33 We found a strong correlation between the frequency of an *Ebf* loss-of-function phenotype and  
34 the mutagenesis efficacies of individual *Ebf*-targeting sgRNAs tested using this method. We  
35 anticipate that our approach can be scaled up to systematically design and deliver highly efficient  
36 sgRNAs for the tissue-specific investigation of gene functions in *Ciona*.

37

38

39

40

41

42

## 43 **Introduction**

44 A platform for targeted mutagenesis has been recently developed based on the prokaryotic  
45 immune response system known as CRISPR/Cas (Clustered Regularly Interspaced Short  
46 Palindromic Repeats/CRISPR-Associated) (BARRANGOU *et al.* 2007). In its most common  
47 derivation for genome engineering applications, the system makes use of a short RNA sequence,  
48 known as a single guide RNA (sgRNA) to direct the Cas9 nuclease of *Streptococcus pyogenes* to  
49 a specific target DNA sequence. (JINEK *et al.* 2012; CONG *et al.* 2013; JINEK *et al.* 2013; MALI *et*  
50 *al.* 2013). Although initial Cas9 binding requires a Protospacer Adjacent Motif (PAM) sequence,  
51 most commonly “NGG”, the high specificity of this system is accounted for by Watson-Crick  
52 base pairing between the 5’ end of the sgRNA and a 17-20bp “protospacer” sequence  
53 immediately adjacent to the PAM (FU *et al.* 2014). Upon sgRNA-guided binding to the intended  
54 target, Cas9 generates a double stranded break (DSB) within the protospacer sequence. Imperfect  
55 repair of these DSBs by non-homologous end joining (NHEJ) often results in short insertions or  
56 deletions (indels) that may disrupt the function of the targeted sequence. Numerous reports have  
57 confirmed the high efficiency of CRISPR/Cas9 for genome editing purposes (DICKINSON *et al.*  
58 2013; HWANG *et al.* 2013; WANG *et al.* 2013a; KOIKE-YUSA *et al.* 2014; PAIX *et al.* 2014;  
59 SHALEM *et al.* 2014; WANG *et al.* 2014; GANTZ AND BIER 2015; SANJANA *et al.* 2016).

60  
61 The tunicate *Ciona* is a model organism for the study of chordate-specific developmental  
62 processes (SATO 2013). The CRISPR/Cas9 system was adapted to induce site-specific DSBs in  
63 the *Ciona* genome (SASAKI *et al.* 2014; STOLFI *et al.* 2014). Using electroporation to transiently  
64 transfect *Ciona* embryos with plasmids encoding CRISPR/Cas9 components, we were able to  
65 generate clonal populations of somatic cells carrying loss-of-function mutations of *Ebf*, a  
66 transcription-factor-coding gene required for muscle and neuron development, in F0-generation

67 embryos (STOLFI *et al.* 2014). By using developmentally regulated *cis*-regulatory elements to  
68 drive Cas9 expression in specific cell lineages or tissue types, we were thus able to control the  
69 disruption of *Ebf* function with spatiotemporal precision. Following this proof-of-principle,  
70 tissue-specific CRISPR/Cas9 has rapidly propagated as a simple yet powerful tool to elucidate  
71 gene function in the *Ciona* embryo (ABDUL-WAJID *et al.* 2015; COTA AND DAVIDSON 2015;  
72 SEGADE *et al.* 2016; TOLKIN AND CHRISTIAEN 2016).

73

74 We sought to expand the strategy to target more genes, with the ultimate goal of building a  
75 genome-wide library of sgRNAs for systematic genetic loss-of-function assays in *Ciona*  
76 embryos. However, not all sgRNAs drive robust CRISPR/Cas9-induced mutagenesis, and few  
77 guidelines exist for the rational design of highly active sgRNAs, which are critical for rapid gene  
78 disruption in F0. This variability and unpredictable efficacy demands experimental validation of  
79 each sgRNA tested. Individual studies have revealed certain nucleotide sequence features that  
80 correlate with high sgRNA expression and/or activity in CRISPR/Cas9-mediated DNA cleavage  
81 (DOENCH *et al.* 2014; GAGNON *et al.* 2014; REN *et al.* 2014; WANG *et al.* 2014; CHARI *et al.*  
82 2015; FUSI *et al.* 2015; HOUSDEN *et al.* 2015; MORENO-MATEOS *et al.* 2015; WONG *et al.* 2015;  
83 XU *et al.* 2015; DOENCH *et al.* 2016). These studies have been performed in different organisms  
84 using a variety of sgRNA and Cas9 delivery methods and show varying ability to predict sgRNA  
85 activities across platforms (HAEUSSLER *et al.* 2016).

86

87 Given the uncertainty regarding how sgRNA design principles gleaned from experiments in  
88 other species might be applicable to *Ciona*, we tested a collection of sgRNAs using our own  
89 modified tools for tissue-specific CRISPR/Cas9-mediated mutagenesis in *Ciona* embryos. We  
90 describe here the construction and validation of this collection using high-throughput sequencing

91 of PCR-amplified target sequences. This dataset allowed us to develop a practical pipeline for  
92 optimal design and efficient assembly of sgRNA expression constructs for use in *Ciona*.

93

## 94 **Results**

### 95 **High-Throughput sequencing to estimate sgRNA-specific mutagenesis rates**

96 Previous studies using CRISPR/Cas9-based mutagenesis in *Ciona* revealed that different  
97 sgRNAs have varying ability to induce mutations (SASAKI *et al.* 2014; STOLFI *et al.* 2014). In  
98 order to test a larger number of sgRNAs and identify parameters that may influence mutagenesis  
99 efficacy, we constructed a library of 83 sgRNA expression plasmids targeting a set of 23 genes  
100 (**Table 1**). The majority of these genes are transcription factors and signaling molecules of  
101 potential interest in the study of cardiopharyngeal mesoderm development. The cardiopharyngeal  
102 mesoderm of *Ciona*, also known as the Trunk Ventral Cells (TVCs), are multipotent cells that  
103 invariantly give rise to the heart and pharyngeal muscles of the adult (HIRANO AND NISHIDA  
104 1997; STOLFI *et al.* 2010; RAZY-KRAJKA *et al.* 2014), thus sharing a common ontogenetic motif  
105 with the cardiopharyngeal mesoderm of vertebrates (WANG *et al.* 2013b; DIOGO *et al.* 2015;  
106 KAPLAN *et al.* 2015).

107

108 We followed a high-throughput-sequencing-based approach to quantify the efficacy of each  
109 sgRNA, i.e. its ability to cause CRISPR/Cas9-induced mutations in targeted sequences in the  
110 genome (**Figure 1a-c**). The 83 sgRNA plasmids were co-electroporated with  
111 *Eef1a1>nls::Cas9::nls* plasmid. The ubiquitous *Eef1a1* promoter is active in all cell lineages of  
112 the embryo and has been used to express a variety of site-specific nucleases for targeted somatic  
113 knockouts in *Ciona* (SASAKURA *et al.* 2010; KAWAI *et al.* 2012; SASAKI *et al.* 2014; STOLFI *et al.*  
114 2014; TREEN *et al.* 2014). Each individual sgRNA + Cas9 vector combination was electroporated

115 into pooled *Ciona* zygotes, which were then grown at 18°C for 16 hours post-fertilization (hpf;  
116 embryonic stage 25)(HOTTA *et al.* 2007). Targeted sequences were individually PCR-amplified  
117 from each pool of embryos. Each target was also amplified from “negative control” embryos  
118 grown in parallel and electroporated with *Eef1a1>nls::Cas9::nls* and “*U6>Negative Control*”  
119 sgRNA vector. Agarose gel-selected and purified amplicons (varying from 108 to 350 bp in  
120 length) were pooled in a series of barcoded “targeted” and “negative control” Illumina  
121 sequencing libraries and sequenced using the Illumina MiSeq platform.

122  
123 Alignment of the resulting reads to the reference genome sequence (SATOU *et al.* 2008) revealed  
124 that targeted sites were represented on average by 16,204 reads, with a median of 3,899 reads  
125 each (**Supplementary Table 1**). The ability of each sgRNA to guide Cas9 to induce DSBs at its  
126 intended target was detected by the presence of insertions and deletions (indels) within the  
127 targeted protospacer + PAM. The ratio of [indels]/[total reads] represents our estimation of the  
128 mutagenesis efficacy of the sgRNA (**Figure 1b-d, Supplementary Table 1**). For each mutation,  
129 an unknown number of cell divisions occur between the moment Cas9 induces a DSB and the  
130 time of sample collection and genomic DNA extraction. This prevents us from quantifying the  
131 true mutagenesis rates. However, we can surmise that this applies comparably to all sgRNAs,  
132 such that our values still represent an accurate ranking of mutagenesis efficacy.

133  
134 For simplicity, we did not count single nucleotide point mutations, even though a fraction of  
135 them may result from NHEJ-repair of a DSB event. Our data indicated that all sgRNAs (with the  
136 exception of Neurog.2) were able to induce DSBs, with estimated efficacies varying from 0.05%  
137 (Ebf.4) to 59.63% (Htr7-r.2). Although each sgRNA was tested only once, we did not observe

138 any evidence of electroporation variability or batch effects that may have confounded our  
139 estimates (**Supplementary Figure 1**).

140

141 This conservative approach most likely underestimates the actual mutagenesis rates. First, we  
142 excluded point mutations potentially resulting from imperfect DSB repair. Second, but more  
143 importantly, amplicons from transfected cells are always diluted by wild-type sequences from  
144 untransfected cells in the same sample, due to mosaic incorporation of sgRNA and Cas9  
145 plasmids. Indeed, we previously observed an enrichment of mutated sequences amplified from  
146 reporter transgene-expressing cells isolated by magnetic-activated cell sorting (representing the  
147 transfected population of cells) relative to unsorted cells (representing mixed transfected and  
148 untransfected cells) (STOLFI *et al.* 2014). In that particular example, the estimated mutagenesis  
149 efficacy induced by the Ebf.3 sgRNA was 66% in sorted sample versus 45% in mixed sample.  
150 This suggests the actual efficacies of some sgRNAs may be up to 1.5-fold higher than their  
151 estimated rates.

152

153 Analysis of unique indels generated by the activity of two efficient sgRNAs, Ebf.3 and Lef1.2,  
154 indicated a bias towards deletions rather than insertions, at a ratio of roughly 2:1  
155 deletions:insertions (**Figure 1e**). However, these two sgRNAs generated different distributions of  
156 indel lengths, indicating indel position and size may depend on locus-specific repair dynamics as  
157 previously shown (BAE *et al.* 2014).

158

159 Numerous studies have reported the potential off-target effects of CRISPR/Cas9 in different  
160 model systems (FU *et al.* 2013; HSU *et al.* 2013; PATTANAYAK *et al.* 2013; CHO *et al.* 2014). For  
161 this study, we were able to mostly select highly specific sgRNAs, owing to the low frequency of

162 predicted off-target sequences in the small, A/T-rich *Ciona* genome (see **Discussion** for details).  
163 To test the assumption that off-target DSBs are unlikely at partial sgRNA seed-sequence  
164 matches, we analyzed the mutagenesis rates at two potential off-target sites that matched the  
165 protospacer at the 10 and 8 most PAM-proximal positions of the Ebf.3 and Fgf4/6.1 sgRNAs,  
166 respectively. We did not detect any mutations in 5,570 and 6,690 reads mapped to the two loci,  
167 respectively, suggesting high specificity of the sgRNA:Cas9 complex to induce DSBs only at  
168 sites of more extensive sequence match.

169

### 170 **Identifying sequence features correlated with sgRNA efficacy**

171 We analyzed our dataset for potential correlations between target sequence composition and  
172 sgRNA-specific mutagenesis rate (excluding the Bmp2/4.1 sgRNA because only two reads  
173 mapped to its target sequence). We hypothesized that, if mutagenesis efficacy can be predicted  
174 by nucleotide composition at defined positions in the protospacer and flanking sequences, then  
175 comparing the target sequences of the most or least active sgRNAs in our dataset should reveal  
176 features that affect CRISPR/Cas9 efficacy in *Ciona*. To that effect, we performed nucleotide  
177 enrichment analyses for the top and bottom 25% sgRNAs ranked by measured mutagenesis  
178 efficacy (**Figure 2**)(SCHNEIDER AND STEPHENS 1990; CROOKS *et al.* 2004). For the top 25%  
179 sgRNAs, guanine was overrepresented in the PAM-proximal region, while the ambiguous  
180 nucleotide of the PAM ('N' in 'NGG') was enriched for cytosine. We also observed an overall  
181 depletion of thymine in the protospacer sequence for the top 25% sgRNAs, likely due to  
182 premature termination of PolIII-driven transcription as previously demonstrated (WU *et al.*  
183 2014). Among the bottom 25% sgRNAs, we observed a higher representation of cytosine at  
184 nucleotide 20 of the protospacer (**Figure 2**). All these observations are consistent with the  
185 inferences drawn from previous studies, suggesting that certain sgRNA and target sequence



186 features that influence Cas9:sgRNA-mediated mutagenesis rates are consistent across different  
187 experimental systems (GAGNON *et al.* 2014; REN *et al.* 2014; WU *et al.* 2014; CHARI *et al.* 2015;  
188 MORENO-MATEOS *et al.* 2015; HAEUSSLER *et al.* 2016).

189  
190 Several studies in different model organisms have similarly examined the nucleotide preferences  
191 amongst sgRNAs inducing high or low rates of mutagenesis, and put forth predictive heuristics  
192 and/or algorithms for the rational design of highly active sgRNAs (DOENCH *et al.* 2014; GAGNON  
193 *et al.* 2014; REN *et al.* 2014; WANG *et al.* 2014; CHARI *et al.* 2015; FUSI *et al.* 2015; HOUSDEN *et*  
194 *al.* 2015; MORENO-MATEOS *et al.* 2015; WONG *et al.* 2015; XU *et al.* 2015; DOENCH *et al.* 2016).  
195 These various algorithms have been evaluated, summarized, and aggregated by the CRISPR  
196 sgRNA design web-based platform CRISPOR (HAEUSSLER *et al.* 2016). According to this meta-  
197 analysis, the “Fusi/Doench” algorithm (“Rule Set 2”)(FUSI *et al.* 2015; DOENCH *et al.* 2016) is  
198 the best at predicting the activities of sgRNA transcribed *in vivo* from a U6 small RNA promoter  
199 transcribed by RNA Polymerase III (PolIII), while CRISPRscan is recommended for sgRNAs  
200 transcribed *in vitro* from a T7 promoter (MORENO-MATEOS *et al.* 2015).

201  
202 *Ciona* rearing conditions differ from most other model systems, being a marine invertebrate that  
203 develops optimally at 16-24°C (BELLAS *et al.* 2003). Moreover, most CRISPR/Cas9-based  
204 experiments in *Ciona* rely on *in vivo* transcription of sgRNAs built with a modified “F+E”  
205 backbone (CHEN *et al.* 2013) by a *Ciona*-specific U6 promoter (NISHIYAMA AND FUJIWARA  
206 2008). We used CRISPOR to calculate predictive scores for all sgRNAs in our data set and  
207 compare these scores to our mutagenesis efficacy measurements for each (**Figure 3a,**  
208 **Supplementary Table 1**). We found that indeed the Fusi/Doench score best correlated with our  
209 measured sgRNA efficacies, with a Spearman’s rank correlation coefficient ( $\rho$ ) of 0.435

210 (p=3.884e-05)(**Figure 3a**). CRISPRscan, the algorithm based on *in vitro*-, T7-transcribed  
211 sgRNAs injected into zebrafish, was less predictive ( $\rho = 0.344$ , p=0.001435)(**Supplementary**  
212 **Table 1**), supporting the conclusion that sgRNA expression method (e.g. U6 vs. T7) accounts for  
213 an important parameter when choosing an sgRNA design algorithm. Scores computed by other  
214 published algorithms available on the CRISPOR platform did not yield good correlations with  
215 our measurements (**Supplementary Table 1**), indicating these are perhaps not suited for  
216 predicting sgRNA activity in *Ciona*.

217  
218 In a previous study, highly penetrant, tissue-specific loss-of-function phenotypes in F0 embryos  
219 were elicited using the *Ebf.3* sgRNA (STOLFI *et al.* 2014), which in our current study had a  
220 measured mutagenesis efficacy of 37% . Further comparison of measured mutagenesis efficacy  
221 and mutant phenotype frequency for a series of *Ebf*-targeting sgRNAs revealed that an estimated  
222 sgRNA efficacy at least 25% correlated with over 70% reduction in the frequency of embryos  
223 expressing an *Islet* reporter construct (see below and **Figure 6**). We thus reasoned that a  
224 mutagenesis efficacy of ~25% would be the minimum threshold of acceptable sgRNA activity  
225 for loss-of-function assays in F0. Within our dataset, among the sgRNAs that had a Fusi/Doench  
226 score >60, 18 of 23 (78%) had a mutagenesis efficacy rate over 24% (**Figure 3b**). In contrast,  
227 only 8 of 25 (32%) of sgRNAs with a Fusi/Doench score <50 had an efficacy over 24% (**Figure**  
228 **3b**). Indeed, a receiver operating characteristic (ROC) analysis showed an area under the curve  
229 (AUC) of 0.77 when using Fusi/Doench score as a classifier of “good” (>24.5% efficacy) vs.  
230 “bad” ( $\leq 24.5\%$ ) sgRNAs (**Figure 3c**). The most accurate Fusi/Doench score cutoffs appeared to  
231 be between 50 and 55, when taking both specificity and sensitivity into account (**Supplementary**  
232 **Table 2, Supplementary Figure 2**). However, if the number of candidate sgRNAs is not  
233 limiting, it may be more desirable to use a Fusi/Doench score cutoff of 60 in order to avoid false  
10

234 positives (i.e., sgRNAs that are predicted as “good” when in reality they are “bad”). Thus, for  
235 *Ciona*, we recommend using CRISPOR to select sgRNAs with Fusi/Doench scores >60 and  
236 avoid those with Fusi/Doench <50. We believe this approach will significantly streamline the  
237 search for suitable U6 promoter-driven sgRNAs targeting one’s gene of interest.

238

### 239 **Multiplexed targeting with CRISPR/Cas9 generates large deletions in the *Ciona* genome**

240 Large deletions of up to 23 kb of intervening DNA resulting from NHEJ between two  
241 CRISPR/Cas9-induced DSBs have been reported in *Ciona* (ABDUL-WAJID *et al.* 2015). For  
242 functional analyses of protein-coding genes, such deletions would more likely produce null  
243 mutations than small deletions resulting from the action of lone sgRNAs. To test whether we  
244 could cause tissue-specific large deletions in F0 embryos, we targeted the forkhead/winged helix  
245 transcription-factor-encoding gene *Foxf* (**Figure 4a**), which contributes to cardiopharyngeal  
246 development in *Ciona* (BEH *et al.* 2007). We co-electroporated *Eef1a1>nls::Cas9::nls* with  
247 sgRNA vectors *Foxf.4* and *Foxf.2* (with induced mutagenesis rates of 39% and 18%,  
248 respectively). We extracted genomic DNA from electroporated embryos and PCR-amplified the  
249 sequence spanning both target sites. We obtained a specific ~300 bp PCR product corresponding  
250 to the amplified region missing the ~2.1 kbp of intervening sequence between the two target sites  
251 (**Figure 4b**). Cloning the deletion band and sequencing individual clones confirmed that the  
252 short PCR product corresponds to a deletion of most of the *Foxf* first exon and 5’ *cis*-regulatory  
253 sequences (BEH *et al.* 2007). We did not detect this deletion using genomic DNA extracted from  
254 embryos electroporated with either sgRNA alone. Similar deletion PCR products were observed,  
255 cloned, and sequenced for other genes including *Nk4*, *Fgfr*, *Mrf*, *Htr7-related*, *Bmp2/4*, and  
256 *Hand*, using pairs of highly mutagenic sgRNAs (**Supplementary Figure 3**). The largest deletion  
257 recorded was ~3.6 kbp, with sgRNAs *Nk4.2* (46% efficacy) and *Nk4.3* (38% efficacy), entirely

258 removing the sole intron of *Nk4* and small portions of the flanking exons. The sgRNAs targeting  
259 *Mrf* were shown to inhibit its function and subsequent siphon muscle development (TOLKIN AND  
260 CHRISTIAEN 2016).

261

262 *Foxf* is expressed in TVCs and head epidermis (**Figure 4c**), the latter of which is derived  
263 exclusively from the animal pole (NISHIDA 1987; IMAI *et al.* 2004; PASINI *et al.* 2006; BEH *et al.*  
264 2007). Because the ~2.1 kbp deletion introduced in the *Foxf* locus excised the epidermal  
265 enhancer and basal promoter (BEH *et al.* 2007), we sought to examine the effects of these large  
266 deletions on *Foxf* transcription. We used the *cis*-regulatory sequences from *Zfpm* (also known as  
267 *Friend of GATA*, or *Fog*, and referred to as such from here onwards) to drive Cas9 expression in  
268 early animal pole blastomeres (ROTHBÄCHER *et al.* 2007). We electroporated  
269 *Fog>nls::Cas9::nls* together with *Foxf.2* and *Foxf.4* sgRNA vectors and *Fog>H2B::mCherry*,  
270 and raised embryos at 18°C for 9.5 hpf (early tailbud, embryonic stage 20). We performed whole  
271 mount mRNA *in situ* hybridization to monitor *Foxf* expression, expecting it to be silenced in  
272 some epidermal cells by tissue-specific CRISPR/Cas9-induced deletions of the *Foxf cis*-  
273 regulatory sequences on both homologous chromosomes in each cell. Indeed, we observed  
274 patches of transfected head epidermal cells (marked by H2B::mCherry) in which *Foxf* expression  
275 was reduced or eliminated (**Figure 4d**). This was in contrast to the uniform, high levels of *Foxf*  
276 expression observed in “control” embryos electroporated with *Ebf.3* sgRNA (*Ebf* is unlikely to  
277 be involved in *Foxf* regulation in the epidermis where it is not expressed, **Figure 4c**). Taken  
278 together, these results indicate that, by co-electroporating two or more highly active sgRNAs  
279 targeting neighboring sequences, one can frequently generate large deletions in the *Ciona*  
280 genome in a tissue-specific manner.

281

282 **Rapid generation of sgRNA expression cassettes ready for embryo transfection**

283 CRISPR/Cas9 is an efficient and attractive system for targeted mutagenesis in *Ciona*, but cloning  
284 individual sgRNA vectors is a labor-intensive, rate-limiting step. To further expedite  
285 CRISPR/Cas9 experiments, we adapted a one-step overlap PCR (OSO-PCR) protocol to generate  
286 U6 promoter>sgRNA expression “cassettes” for direct electroporation without purification  
287 (Figure 5, Supplementary Figure 4, see Materials and Methods and Supplementary  
288 Protocol for details). We tested the efficacy of sgRNAs expressed from these unpurified PCR  
289 products, by generating such expression cassettes for the validated Ebf.3 sgRNA. We  
290 electroporated *Eef1a1>nls::Cas9::nls* and 25 µl (corresponding to ~2.5 µg, see Materials and  
291 Methods and Supplementary Figure 5) of unpurified, *U6>Ebf.3* sgRNA OSO-PCR or  
292 *U6>Ebf.3* sgRNA traditional PCR products (total electroporation volume: 700 µl). Next-  
293 generation sequencing of the targeted Ebf.3 site revealed mutagenesis rates similar to those  
294 obtained with 75 µg of *U6>Ebf.3* sgRNA plasmid (Supplementary Table 1). This was  
295 surprising given the much lower total amount of DNA electroporated from the PCR reaction  
296 relative to the plasmid prep (2.5 µg vs. 75 µg). This discrepancy could indicate a higher  
297 efficiency of transcription of linear vs. circular transfected DNA, though more thorough analyses  
298 are warranted to investigate the behavior of linear DNA in *Ciona* embryos.

299  
300 To assess whether unpurified sgRNA PCR cassettes could be used in CRISPR/Cas9-mediated  
301 loss-of-function experiments in F0 embryos, we assayed the expression of an *Islet* reporter  
302 transgene in MN2 motor neurons (RYAN *et al.* 2016), which depends upon Ebf function (STOLFI  
303 *et al.* 2014). Indeed, *Islet>GFP* expression was downregulated in embryos electroporated with  
304 *Sox1/2/3>nls::Cas9::nls* and 25 µl of unpurified *U6>Ebf.3* traditional PCR or 25µg *U6>Ebf.3*  
305 plasmid, but not with 25 µl (~2.5 µg) of unpurified *U6>Negative Control* sgRNA PCR cassette

306 **(Figure 6a-d)**. Taken together, these results indicate that unpurified PCR products can be used in  
307 lieu of plasmids to express sgRNAs for tissue-specific CRISPR/Cas9-mediated mutagenesis in  
308 *Ciona* embryos.

309

### 310 **Correlation between sgRNA efficacy and mutant phenotype penetrance**

311 Since we measured a wide range of mutagenesis efficacies across our library of 83 sgRNAs, we  
312 wanted to assess how this variability correlates with mutant phenotype penetrance. One  
313 possibility is that sgRNA efficacies and frequencies of mutant phenotypes in F0 are linearly  
314 correlated. Alternatively, mutant phenotypes might only be observed at distinct thresholds of  
315 sgRNA activity.

316

317 To test this, we designed 7 additional sgRNAs (Ebf.A through Ebf.G) targeting the IPT and HLH  
318 domain-coding exons of *Ebf* (**Figure 6a,e, Supplementary Table 3**). We generated these  
319 sgRNA expression cassettes by OSO-PCR, and co-electroporated 25  $\mu$ l of each reaction with  
320 either 25  $\mu$ g *Eef1a1>nls::Cas9::nls* (for mutagenesis efficacy sequencing) or 40  $\mu$ g  
321 *Sox1/2/3>nls::Cas9::nls* + 15  $\mu$ g *Sox1/2/3>H2B::eGFP* + 40  $\mu$ g *Islet>mCherry* (for phenotype  
322 assay). sgRNA efficacies were measured by direct Sanger sequencing of the target region PCR-  
323 amplified from larvae electroporated with the former combination (see **Materials and methods**  
324 for details), and *Islet>mCherry* expression in H2B::eGFP+ motor neurons was scored in larvae  
325 electroporated with the latter mix.

326

327 Quantification of indel-shifted electrophoresis chromatogram peaks (“Peakshift” assay) revealed  
328 sgRNA mutagenesis efficacies ranging from 5% to 43% (**Figure 6e, Supplementary Table 3**).

329 Of note, the sgRNA with the lowest efficacy (Ebf.E) was clearly hampered by a naturally

330 occurring SNP that eliminates the PAM (NGG to NGA) in a majority of haplotypes. In parallel,  
331 the proportion of transfected embryos *Islet>mCherry* expression was observed to vary between  
332 0% and 94%. When this was plotted against the measured mutagenesis efficacies, we observed a  
333 nearly perfect linear correlation between the mutant phenotype (loss of *Islet>mCherry*  
334 expression) and *Ebf* mutagenesis (**Figure 6e, Supplementary Table 3**). Taken together, these  
335 results suggest that highly efficient sgRNAs can be generated from OSO-PCR cassettes and  
336 validated for loss-of-function studies by Sanger sequencing. The Sanger sequencing-based  
337 peakshift assay is highly reproducible and approximates the efficacy rates estimated by NGS  
338 (**Supplementary Table 6**). As such, we recommend the peakshift assay as a cheap, fast  
339 alternative for testing sgRNA activity in *Ciona* embryos.

340

#### 341 **Genome-wide design and scoring of sgRNAs for *Ciona***

342 While *Ciona* researchers will find the Fusi/Doench scoring system and the OSO-PCR method  
343 useful for sgRNA expression cassette design and assembly, we hoped to further empower the  
344 community by pre-emptively designing all possible sgRNAs with a unique target site within 200  
345 bp of all *Ciona* exonic sequences. We computationally identified 3,596,551 such sgRNAs. We  
346 have compiled all sgRNA sequences and their corresponding specificity and efficiency scores  
347 (including Fusi/Doench). They are available as a UCSC Genome Browser track for the Ci2  
348 genome assembly (<http://genome.ucsc.edu/>)[FOR PEER REVIEW ONLY: [http://genome-  
349 test.soe.ucsc.edu](http://genome-test.soe.ucsc.edu)], with links to CRISPOR for off-target prediction and automated OSO-PCR  
350 primer design. This track is freely available for download to use on other browsers, like those of  
351 specific interest to the tunicate community such as ANISEED (BROZOVIC *et al.* 2015) or GHOST  
352 (SATOU *et al.* 2005).

353



354 **Discussion**

355 We have built a library of 83 plasmid vectors for the *in vivo* expression of sgRNAs targeting 23  
356 genes expressed in the cardiopharyngeal mesoderm and surrounding tissues, mostly  
357 hypothesized to be involved in regulating the specification of heart and/or pharyngeal muscles in  
358 *Ciona*, even though many have complex expression patterns and probably pleiotropic functions.  
359 We have also established reliable protocols for the validation of sgRNA efficacy in  
360 electroporated *Ciona* embryos by either next-generation sequencing or Sanger sequencing. This  
361 has allowed us to estimate the activity of all these sgRNAs, which are ready to be used for  
362 ongoing and future functional studies. We are aware that the lack of biological replicates for the  
363 NGS-based measurements and other technical limitations of either assay may affect the accuracy  
364 of some of our mutagenesis efficacy estimates. However, our observations suggest that our  
365 results were not greatly affected by electroporation variability (**Supplementary Figure 1;**  
366 **Supplementary Table 6**), and that our data are accurate enough to identify sgRNAs of high or  
367 low activity in *Ciona*.

368  
369 By analyzing correlations between target sequence nucleotide composition and sgRNA  
370 mutagenesis efficacy, we identified sgRNA sequence features that may contribute to  
371 Cas9:sgRNA activity. Some of these sequence features have been identified in previous  
372 CRISPR/Cas9-mediated mutagenesis screens performed in other metazoan model organisms,  
373 suggesting that these are determined by the intrinsic properties of sgRNAs and/or Cas9 (DOENCH  
374 *et al.* 2014; GAGNON *et al.* 2014; REN *et al.* 2014; CHARI *et al.* 2015; MORENO-MATEOS *et al.*  
375 2015). For instance, sgRNA efficacy is correlated with increased guanine content in the PAM-  
376 proximal nucleotides of the sgRNA, postulated to be due to increased sgRNA stability by G-  
377 quadruplex formation (MORENO-MATEOS *et al.* 2015). This would explain the specific



378 enrichment for guanine but not cytosine, even if both could in theory augment sgRNA folding or  
379 binding to target DNA. We also encountered a depletion of thymine and cytosine in the PAM-  
380 proximal nucleotides of the protospacers for highly active sgRNAs. The strong negative  
381 correlation between sgRNA efficacy and thymine content of the protospacer is easily attributed  
382 to our use of the PolIII-dependent U6 promoter to express our sgRNAs. It has been shown that  
383 termination of transcription by PolIII can be promoted by degenerate poly-dT tracts (NIELSEN *et*  
384 *al.* 2013). A high number of non-consecutive thymines clustered in the protospacer could thus  
385 result in lower sgRNA expression level due to premature termination of sgRNA transcription  
386 (STOLFI *et al.* 2014; WU *et al.* 2014). Similarly, adenines are thought to contribute to the  
387 instability of sgRNAs (MORENO-MATEOS *et al.* 2015), suggesting that CRISPR/Cas9  
388 mutagenesis efficacies might be primarily determined by sgRNA transcription and degradation  
389 rates, which will vary depending on the species studied and the mode of sgRNA delivery (e.g. *in*  
390 *vitro* vs. *in vivo* synthesis).

391  
392 We demonstrate that among published sgRNA prediction algorithms, Fusi/Doench (FUSI *et al.*  
393 2015; DOENCH *et al.* 2016) functions well as a classifier for “good” (>24.5% mutagenesis  
394 efficacy) and “bad” (<24.5%) sgRNAs. Despite these general trends, several sgRNAs defied this  
395 algorithm-based prediction. This suggests that there are multiple, possibly additive or synergistic  
396 factors that determine the mutagenesis efficacy, only one of which is primary sequence  
397 composition of the sgRNA or target. Other factors that can influence Cas9 binding include  
398 chromatin accessibility and nucleosome occupancy (WU *et al.* 2014; HINZ *et al.* 2015;  
399 HORLBECK *et al.* 2016; ISAAC *et al.* 2016). What other additional factors contribute to variability  
400 of *in vivo* sgRNA mutagenesis efficacies will be an important topic of study as CRISPR/Cas9-

401 based approaches are expanded to address additional questions in basic research as well as for  
402 therapeutic purposes.

403

404 While an optimized predictive algorithm for *Ciona*-specific sgRNA design remains a desirable  
405 goal, our current approach should help other researchers to identify, with greater confidence,  
406 which sgRNAs are likely to confer enough mutagenic activity for functional studies in F0. We  
407 have shown, using a series of *Ebf*-targeting sgRNAs and an *Ebf* loss-of-function readout assay  
408 (*Islet* reporter expression) that a linear correlation exists between sgRNA mutagenesis efficacy  
409 and the probability of somatic gene knockout in F0. In this case, we measured the frequency of a  
410 binary loss-of-function assay (*Islet* ON or OFF) in a large population of embryos. Therefore it is  
411 expected that the probability a homozygous *Ebf* knockout (resulting in *Islet* OFF phenotype)  
412 should be correlated to the observed frequency of *Ebf* mutations in somatic cell populations.  
413 While *Ebf* function can be disrupted by small changes to its crucial IPT/HLH domains, other  
414 genes may prove harder to disrupt with the short indels generated by CRISPR/Cas9. However,  
415 we show that the combinatorial action of two or more sgRNAs can result in high frequency of  
416 large deletions spanning many kbp, which should help generate loss-of-function alleles for such  
417 recalcitrant genes.

418

419 Despite legitimate concerns about potential off-target effects for functional studies, we were not  
420 able to detect CRISPR/Cas9-mediated mutagenesis at two potential off-target sites for the  
421 sgRNAs *Ebf.3* and *Fgf4/6.1*. For the remainder of the sgRNAs, we purposefully selected those  
422 with no strongly predicted off-targets. This was possible in *Ciona* due to two factors. First, the  
423 *Ciona* genome is significantly smaller than the human genome and most metazoans, resulting in  
424 a lower number of similar protospacer sequences. Second, the GC content of the *Ciona* genome

425 is only 35% as compared to 65% in humans, which should result in a lower overall frequency of  
426 canonical PAMs (NGG). Based on these considerations, we predict off-target effects to be less  
427 pervasive in *Ciona* than in other model organisms with more complex, GC-rich genomes.

428

429 Even with improved prediction of sgRNA efficacy and specificity, there is still a need to test  
430 several sgRNAs to identify the optimal one targeting a gene of interest. To this end, we have  
431 developed a cloning-free OSO-PCR method for the rapid assembly of sgRNA expression  
432 cassettes. We have shown that these unpurified PCR cassettes can be directly electroporated into  
433 *Ciona* embryos and screened by either Sanger sequencing of target sequences or mutant  
434 phenotype frequency in F0. The automated design of primers for *Ciona*-specific sgRNA cassette  
435 OSO-PCR has been implemented in the latest version of CRISPOR (<http://crispor.tefor.net/>).

436

437 Finally, we have pre-emptively designed all possible sgRNAs targeting exonic sequences in the  
438 compact *Ciona* genome and calculated their specificity and efficiency by various predictive  
439 algorithms. This track is available online on the UCSC genome browser, but is also freely  
440 available for download and use with other genome browsers. This allows researchers to locally  
441 browse for sgRNAs with predicted high activity targeting their loci of interest. Integration with  
442 the CRISPOR website further allows SNP and off-target prediction, and pre-designed OSO-PCR  
443 oligonucleotide primers for rapid, efficient synthesis and transfection. We expect these resources  
444 to facilitate the scaling of CRISPR/Cas9-mediated targeted mutagenesis and enable genome-  
445 wide screens for gene function in *Ciona*.

446

447

448

## 449 **Materials and Methods**

### 450 **Target sequence selection and sgRNA design**

451 23 genes from *Ciona robusta* (formerly *Ciona intestinalis* type A)(HOSHINO AND TOKIOKA 1967;  
452 BRUNETTI *et al.* 2015) hypothesized to be important for cardiopharyngeal mesoderm  
453 development were shortlisted (**Table 1**) and one to four sgRNAs targeting non-overlapping  
454 sequences per gene were designed, for a total of 83 sgRNA vectors (**Supplementary Table 3**).  
455 Two sgRNAs were designed to target the neurogenic bHLH factor Neurogenin, a gene that is not  
456 expressed in the cardiopharyngeal mesoderm and is not thought to be involved in  
457 cardiopharyngeal development. Target sequences were selected by searching for N<sub>19</sub>+NGG  
458 (protospacer + PAM) motifs and screened for polymorphisms and off-target matches using the  
459 GHOST genome browser and BLAST portal (SATOU *et al.* 2005; SATOU *et al.* 2008). Potential  
460 off-targets were also identified using the CRISPRdirect platform (NAITO *et al.* 2015). sgRNA  
461 expression plasmids were designed for each of these protospacers and constructed using the  
462 *U6>sgRNA(F+E)* vector as previously described (STOLFI *et al.* 2014), as well as a “Negative  
463 Control” protospacer that does not match any sequence in the *C. robusta* genome (5’-  
464 GCTTTGCTACGATCTACATT-3’). Stretches of more than four thymine bases (T) were  
465 avoided due to potential premature transcription termination. Candidate sgRNAs with a partial  
466 PAM-proximal match of 13 bp or more to multiple loci were also discarded due to off-target  
467 concerns. All sgRNAs were designed to target protein-coding, splice-donor, or splice-acceptor  
468 sites, unless specifically noted. We preferred more 5’ target sites, as this provides a greater  
469 probability of generating loss-of-function alleles.

470

471

472

### 473 **Electroporation of *Ciona* embryos**

474 DNA electroporation was performed on pooled, dechorionated zygotes (1-cell stage embryos)  
475 from *C. robusta* adults collected from San Diego, CA (M-REP) as previously described  
476 (CHRISTIAEN *et al.* 2009). All sgRNA plasmid maxipreps were individually electroporated at a  
477 final concentration of 107 ng/μl (75 μg in 700 μl) concentration together with  
478 *Eef1a1>nls::Cas9::nls* plasmid (STOLFI *et al.* 2014) at 35.7 ng/μl (25 μg in 700 μl)  
479 concentration. For testing *U6>Ebf.3* PCR or OSO-PCR, 25 μl was used instead of sgRNA  
480 plasmid. Embryos were then rinsed once in artificial sea water, to remove excess DNA and  
481 electroporation buffer, and grown at 18°C for 16 hours post-fertilization.

482

### 483 **Embryo lysis**

484 After 16 hpf, each pool of embryos targeted with a single sgRNA + Cas9 combination was  
485 washed in one sea water exchange before lysis, to remove excess plasmid DNA, and transferred  
486 to a 1.7 ml microcentrifuge tube. Excess sea water was then removed and embryos were lysed in  
487 50 μl of lysis mixture prepared by mixing 500 μL of DirectPCR Cell Lysis Reagent (Viagen  
488 Biotech Inc., Los Angeles, CA, Cat # 301-C) with 1 μl of Proteinase K (20 mg/ml, Life  
489 Technologies, Carlsbad, CA). The embryos were thoroughly mixed in lysis mixture and  
490 incubated at 68°C for 15 minutes, followed by 95°C for 10 minutes.

491

### 492 **PCR amplification of targeted sequences**

493 Targeted sequences were individually PCR-amplified directly from lysate from embryos targeted  
494 with the respective sgRNA, and from “negative control” lysate (from embryos electroporated  
495 with *Eef1a1>nls::Cas9::nls* and *U6>Negative Control* sgRNA vector). Primers  
496 (**Supplementary Table 4**) were designed to flank target sites as to obtain PCR products in the

497 size range of 108-290bp with an exception of the sequence targeted by Ebf.3 (“Ebf.774” in Stolfi  
498 et al. 2014) and Ebf.4 sgRNAs, for which the designed primers resulted in a product size of 350  
499 bp. Potential off-target sites predicted for sgRNAs Ebf.3  
500 (CTCGCAACGGGGACAACAGGGGG, genome position KhC8:2,068,844-2,068,866) and  
501 Fgf4/6.1 (TATTTTAATTCTGTACCTGTGGG, genome position KhC9:6,318,421-6,318,443)  
502 were amplified to test for off-target CRISPR/Cas9 activity with the primers: 5’-  
503 CCAGCACTTCAGAGCAATCA-3’ and 5’-TGACGTCACACTCACCGTTT-3’ (Ebf.3), and  
504 5’-AACGATTGTCCATACGAGGA-3’ and 5’-ACTTCCCAACAGCAAACACTGG-3’ (Fgf/6.1).  
505  
506 For each targeted sequence, 12.5 µL PCR reactions were set up with final concentrations of 600  
507 nM each primer, 300 µM dNTPs, 1 mM MgSO<sub>4</sub>, 2X buffer, and 0.05 U/µl Platinum Pfx DNA  
508 polymerase (Life Technologies), and subjected to the following PCR program: an initial cycle of  
509 10 minutes at 95°C, followed by 30 cycles of 30 seconds at 94°C, 30s at 60°C and 30s at 68°C,  
510 and a final cycle of 3 minutes at 68°C. PCR reactions were quickly checked on an agarose gel for  
511 the presence/absence of amplicon. Those that resulted in a single band were not initially purified.  
512 For those reactions with more than one band, the correct amplicon (selected based on expected  
513 size) was gel purified using a Nucleospin Gel Clean-up Kit (Macherey-Nagel, Düren, Germany).  
514 Purified and unpurified PCR products were then pooled for subsequent processing. The majority  
515 of PCR products amplified from larvae treated with Cas9 + gene-targeting sgRNA were pooled  
516 in Pool 1. All products from larvae treated with Cas9 + “negative control” sgRNA were pooled  
517 in Pool 2. For those sequences targeted by distinct sgRNAs but amplified using the same set of  
518 flanking primers, their PCR products were split into separate pools, as to allow for separate  
519 efficacy estimates.

520

## 521 Sequencing library preparation

522 The PCR product pools were electrophoresed on ethidium bromide-stained, 1% agarose gel in  
523 0.5X Tris-Acetate-EDTA (TAE) buffer and a band of ~150-300 bp was excised (Nucleospin gel  
524 and PCR cleanup kit, Macherey-Nagel). 102-235 ng of each pool was used as a starting material  
525 to prepare sequencing libraries (protocol adapted from  
526 [http://wasp.einstein.yu.edu/index.php/Protocol:directional\\_WholeTranscript\\_seq](http://wasp.einstein.yu.edu/index.php/Protocol:directional_WholeTranscript_seq) ). Ends were  
527 repaired using T4 DNA polymerase (New England Biolabs, Ipswich, MA) and T4  
528 Polynucleotide Kinase (New England Biolabs), and then A-tailed using Klenow fragment (3'→5'  
529 exo-) (New England Biolabs) and dATP (Sigma-Aldrich, St. Louis, MO). Each pool was then  
530 ligated to distinct barcoded adapters. (NEXTflex DNA Barcodes - BioO Scientific Cat# 514101).  
531 The six barcodes used in this study were: CGATGT, TGACCA, ACAGTG, GCCAAT,  
532 CAGATC and CTTGTA. At this step, the adapter-ligated DNA fragments were purified twice  
533 using Ampure XP beads (Beckman Coulter, Brea, CA). The final amplification, using primers  
534 included with NEXTflex adapters, was done using the PCR program: 2 minutes at 98°C followed  
535 by 8 cycles of 30 seconds at 98°C; 30 seconds at 60°C; 15 seconds of 72°C, followed by 10  
536 minutes at 72°C. Ampure XP bead-based selection was performed twice, and the libraries were  
537 quantified using qPCR. The libraries were then mixed in equimolar ratio to get a final DNA  
538 sequencing library concentration of 4 nM. The multiplexed library was sequenced by Illumina  
539 MiSeq V2 platform (Illumina, San Diego, CA) using 2x250 paired end configuration.

540

## 541 Next generation sequencing data analysis

542 FastQ files obtained from sequencing were de-multiplexed and subjected to quality control  
543 analysis. FastQ reads were mapped to the 2008 KyotoHoya genome assembly (SATOU *et al.*  
544 2008) by local alignment using Bowtie2.2 (LANGMEAD AND SALZBERG 2012). Single end reads

545 were also mapped to a reduced genome assembly consisting of only those scaffolds containing  
546 the targeted genes. This allowed for a much faster and accurate alignment using Bowtie2.2. The  
547 SAM file generated was converted into a BAM file using *samtools* (LI *et al.* 2009). The BAM  
548 file was sorted and indexed to visualize reads on Integrative Genomics Viewer (IGV) (ROBINSON  
549 *et al.* 2011). Most mutagenesis rates were obtained by counting indels in IGV. For some targets  
550 with partially overlapping aplicon sequences, custom Python scripts were written to parse the  
551 BAM file to get estimated rate of mutagenesis. Since a successful CRISPR/Cas9-mediated  
552 deletion or insertion should eliminate or disrupt all or part of the protospacer + PAM sequence  
553 (jointly termed the “pineapple”), we simply looked for mapped reads in which the pineapple was  
554 not fully present. When appropriate, the rate of naturally occurring indels around each target, as  
555 detected in reads from “negative control” embryos, was subtracted from the raw efficacy rates.  
556 Custom python scripts used are available upon request. Matplotlib (<http://matplotlib.org>) was  
557 used for plotting, Numpy (<http://numpy.org>) and Pandas (<http://pandas.pydata.org>) were used for  
558 data mining. All predictive algorithm scores were generated using CRISPOR  
559 (<http://crispor.tefor.net/>)(HAEUSSLER *et al.* 2016).

560

### 561 **Nucleotide Enrichment Analysis**

562 We used log-odds score as a measure to estimate how enriched each nucleotide was at a given  
563 position in the 43bp region of interest (excluding position 1 of the protospacer, and the ‘GG’ of  
564 the PAM). Log-odds score was defined as the base-2 logarithm of the ratio of probability of  
565 observing nucleotide ‘N’ at position ‘x,’ and the background probability of observing nucleotide  
566 ‘N’ by random chance, given its frequency in our sample space (all sgRNA targets, n=83). A  
567 positive or negative log-odds score reflects enrichment or depletion, respectively, of each  
568 nucleotide at a given position.



569 Mathematically,

$$I(o) = \log_2 \left( \frac{p_x}{p_b} \right); \text{ where}$$

570  $p_x$  = probability of finding nucleotide ‘N’ at position ‘x’

571  $p_b$  = background probability of finding nucleotide ‘N’ at position ‘x’ by chance

572

### 573 **Receiver Operating Characteristic (ROC) curve**

574 For a binary classifier (“good” vs. “bad” sgRNA), there are four possible outcomes: True

575 Positive (TP), False Positive (FP), True Negative (TN), and False Negative (FN). If the predicted

576 classification of the sgRNA by our model was “good” or “bad”, and it was supported by our

577 experimental data (i.e. the empirical mutagenesis rate was above or below 24.5% respectively), it

578 was marked as a “True Positive” or a “True Negative,” respectively. If the experimental data

579 failed to support it, it was marked as a “False Positive” or a “False Negative,” respectively. The

580 true positive rate (TPR), or “Sensitivity”, was defined as the proportion of empirically good

581 sgRNAs that were correctly predicted as good [TPR = TP / (TP + FN)]. Similarly, the true

582 negative rate (TNR), or “Specificity”, was defined as the proportion of empirically bad gRNAs

583 that were correctly predicted as bad [TNR = TN / (TN + FP)]. The false positive rate (FPR) is 1 -

584 Specificity. In figure 3c, we plotted the true positive rates against the false positive rates, all

585 obtained by applying different Fusi/Doench score thresholds (ranging from 0 to 100) to the

586 predictions generated by our model (see **Supplementary Table 2**).

587

### 588 **Combinatorial sgRNA electroporation to induce large deletions**

589 Embryos were electroporated with 25  $\mu\text{g}$  *Eef1a1>nls::Cas9::nls* and two vectors from the set of

590 validated sgRNA plasmids for each targeted gene (50  $\mu\text{g}$  per sgRNA vector). Embryos were

591 grown for 12 hpf at 18°C, pooled, and genomic DNA extracted from them using QIAamp DNA  
592 mini kit (Qiagen). Deletion bands were amplified in PCR reactions using Pfx platinum enzyme  
593 as described above (see “**PCR amplification of targeted sequences**”) and a program in which  
594 the extension time was minimized to 15 seconds only, in order to suppress the longer wild-type  
595 amplicon and promote the replication of the smaller deletion band. Primers used were  
596 immediately flanking the sequences targeted by each pair of sgRNAs (**Supplementary Table 4**).  
597 Products were purified from agarose gels, A-overhung and TOPO-cloned. Colonies were picked,  
598 cultured, prepped and sequence

599

#### 600 **Synthesis and electroporation of unpurified sgRNA PCR expression cassettes**

601 *U6>Ebf.3* and *U6>Negative Control* sgRNA expression cassettes were amplified from their  
602 respective plasmids using the primers U6 forward (5'-TGGCGGGTGTATTAAACCAC-3') and  
603 sgRNA reverse (5'-GGATTCCTTACGCGAAATACG-3') in reactions of final concentrations  
604 of 600 nM each primer, 300 μM dNTPs, 1 mM MgSO<sub>4</sub>, 2X buffer, and 0.05 U/μl Platinum Pfx  
605 DNA polymerase (Life Technologies), and subjected to the following PCR program: an initial  
606 cycle of 3 minutes at 95°C, followed by 30 cycles of 30 seconds at 94°C, 30s at 55°C and 2  
607 minutes at 68°C, and a final cycle of 5 minutes at 68°C. *U6>sgRNA(F+E)::eGFP* (STOLFI *et al.*  
608 2014) was amplified as above but using Seq forward primer (5'-  
609 AGGGTTATTGTCTCATGAGCG-3') instead. For phenotyping Ebf-dependent expression of  
610 *Islet* reporter in MN2 motor neurons (STOLFI *et al.* 2014), embryos were co-electroporated with  
611 35-40 μg of *Sox1/2/3>nls::Cas9::nls*, 5-15 μg of *Sox1/2/3>H2B::mCherry/eGFP*, 30-40 μg of  
612 *Isl>eGFP/mCherry*, and either 25 μg of *U6>Ebf.3* plasmid or 25 μl (~2.5 μg) of unpurified PCR  
613 product.

614

## 615 **sgRNA expression cassette assembly by One-step Overlap PCR (OSO-PCR)**

616 sgRNA PCR cassettes were constructed using an adapted One-step Overlap PCR (OSO-PCR)  
617 protocol (URBAN *et al.* 1997). Basically, a desired protospacer sequence is appended 5' to a  
618 forward primer (5'-GTTTAAGAGCTATGCTGGAAACAG-3') and its reverse complement is  
619 appended 5' to a reverse primer (5'-ATCTATAACCATCGGATGCCTTC-3'). These primers are  
620 then added to a PCR reaction at limiting amounts, together with U6 forward (5'-  
621 TGGCGGGTGTATTAACCAC-3') and sgRNA reverse (5'-  
622 GGATTCCTTACGCGAAATACG-3') primers and separate template plasmids containing the  
623 U6 promoter (*U6>XX*) and the sgRNA scaffold (*XX>sgRNA F+E*). Plasmids are available from  
624 Addgene ([https://www.addgene.org/Lionel\\_Christiaen/](https://www.addgene.org/Lionel_Christiaen/)). The complementarity between the 5'  
625 ends of the inner primers bridges initially separate U6 and sgRNA scaffold sequences into a  
626 single amplicon, and because they are quickly depleted, the entire cassette is preferentially  
627 amplified in later cycles by the outer primers (see **Figure 5** and **Supplementary Protocol** for  
628 details). Final, unpurified reactions should contain PCR amplicon at ~100 ng/μl, as measured by  
629 image analysis after gel electrophoresis (**Supplementary Figure 5**).

630

## 631 **Measuring mutagenesis efficacies of sgRNAs by Sanger sequencing**

632 OSO-PCR cassettes were designed and constructed for the expression of 7 sgRNA targeting  
633 exons 10-12 that code for part of the IPT and HLH domains of Ebf (**Figure 6a, Supplementary**  
634 **Table 3**). Embryos were electroporated with 25 μl of unpurified OSO-PCR product and 25 μg  
635 *Eef1a1>nls::Cas9::nls*, and grown to hatching. For the replication experiment (**Supplementary**  
636 **Table 6**) 75 μg of sgRNA vectors (*Gata4/5/6.2*, *Gata4/5/6.3*, *Gata4/5/6.4*, *Neurog.1*, *Neurog.2*)  
637 were each co-electroporated with 25 μg *Eef1a1>nls::Cas9::nls*. This was repeated over two  
638 separate batches of embryos.

639 All larvae were allowed to hatch and genomic DNA was extracted using the QiaAmp DNA mini  
640 kit (Qiagen). The *Ebf* target region was PCR-amplified using the following primers: (Forward  
641 primer: 5'- CTCCACATGCCTCAACTTTG-3', Reverse primer: 5'-  
642 TGTTCCGCCAAATTGTGAAG-3'). For *Gata4/5/6* target sequences, the primers used were the  
643 corresponding ones from the NGS experiment, while a novel pair of primers was used to amplify  
644 the *Neurog* locus (Forward primer: 5'- AAGTACGGAGAGCAGAATACC-3', Reverse primer:  
645 5'-CTTCTAGTGCATTAAGACC-3'). PCR was performed in 35 cycles using Platinum Pfx  
646 DNA polymerase. The resulting PCR products were gel- or column-purified, and sequenced  
647 using either a flanking PCR primer or an internal sequencing primer (*Ebf* internal: 5'-  
648 AATTGGCTGACAGGTTGGAG-3', *Neurog* internal: 5'-GCTCTTGCTACAAAATGTTGG-  
649 3').

650  
651 The resulting .ab1 sequencing files were then analyzed by ab1 Peak Reporter webtool (ROY AND  
652 SCHREIBER 2014) (<https://apps.thermofisher.com/ab1peakreporter/>)(**Supplementary Table 5**).

653 To quantify the peak “shifts” resulting from CRISPR/Cas9-induced short indels  
654 (**Supplementary Figure 6**), we calculated the sum of “maximum signal 7 scan filtered ratio”  
655 (MaxSig7Scan Sum) values of minor peaks at each position in a 30 bp window starting from the  
656 third bp in the target sequence from the PAM (the most likely Cas9 cut site). The mean  
657 MaxSig7Scan Sum was calculated across all 30 bp of this window, resulting in a “raw peakshift  
658 score”. The same was repeated for the 30 bp window immediately 5' to the cut site in the  
659 sequencing read, for a peakshift “baseline” estimate. This baseline was subtracted from the raw  
660 peakshift score to give the “corrected peakshift score”, a relative quantification of indel  
661 frequency, and therefore of the mutagenesis efficacy of the sgRNA used.

662

## 663 **Whole-exome sgRNA predictions in *Ciona***

664 We used all transcribed regions in the ENSEMBL 65 transcript models (AKEN *et al.* 2016),  
665 extended them by 200 bp on each side, searched for all possible NGG-20bp sgRNA targets in  
666 these sequences and ran them through the command-line version of CRISPOR (HAEUSSLER *et al.*  
667 2016) which aligns 20mers using BWA (LI AND DURBIN 2009) in iterative mode, ranks off-  
668 targets by CFD or MIT scores and calculates the Fusi/Doench 2016 efficiency scores (FUSI *et al.*  
669 2015; DOENCH *et al.* 2016). Efficiency scores were also translated to percentiles for better ease  
670 of use, e.g. a raw Fusi/Doench score of 60 translates to the 80<sup>th</sup> percentile, meaning that 80% of  
671 scored guides are lower than 60. All results are then written to a UCSC BigBed file (RANEY *et*  
672 *al.* 2014) for interactive visualization. The BigBed file can be loaded into all popular genome  
673 browsers, like Ensembl (YATES *et al.* 2016), IGV (ROBINSON *et al.* 2011) or GBrowse (STEIN *et*  
674 *al.* 2002). The track is available on the ci2 assembly on the UCSC Genome Browser  
675 (<http://genome.ucsc.edu>), in the track group “Genes and Gene Predictions”. The source code is  
676 available as part of the UCSC Genome Browser source tree at:  
677 <https://github.com/ucscGenomeBrowser/kent/tree/master/src/hg/makeDb/crisprTrack>

## 679 **Embryo imaging**

680 Fluorescent *in situ* hybridization of *eGFP* or *Foxf* coupled to immunohistochemistry was carried  
681 out as previously described (BEH *et al.* 2007; STOLFI *et al.* 2014). Images were taken on a Leica  
682 Microsystems inverted TCS SP8 X confocal microscope or a Leica DM2500 epifluorescence  
683 microscope. Mouse monoclonal anti- $\beta$ -Gal Z3781 (Promega, Madison, WI) was used diluted at  
684 1:500. Goat anti-Mouse IgG (H+L) Secondary Antibody Alexa Fluor 568 conjugate (Life  
685 Technologies) was used diluted at 1:500.

686

687 **Acknowledgments**

688 We are grateful to Farhana Salek, Kristyn Millan, and Aakarsha Pandey for technical assistance;  
689 Tara Rock for advice on next-generation sequencing; Rahul Satija for sequencing the libraries  
690 and for his invaluable insights into the sgRNA sequence analysis; Justin S. Bois, Shyam Saladi,  
691 Elena K. Perry, and the High Performance Computing team at NYU for their help  
692 troubleshooting the bioinformatic analysis. This work was funded by an NIH K99 HD084814  
693 award to A.S., NIH R01 GM096032 award to L.C., and an NYU Biology Masters Research  
694 Grant to S.G.

695

696

697

698

699

700

701

702

703

704

705

706

707

708

709

710

711

712

713

714

715

716

717

718

719

720

721

722

723 **Table 1. Genes targeted for CRISPR/Cas9-mediated mutagenesis**

724 The 23 genes targeted in the initial screen, each identified here by official gene symbol, aliases, and KyotoHoya  
 725 identifier.

726

| #  | Gene Symbol       | Aliases                                                 | 2012 KyotoHoya ID |
|----|-------------------|---------------------------------------------------------|-------------------|
| 1  | <i>Bmp2/4</i>     | <i>Bone morphogenetic protein 2/4</i>                   | KH.C4.125         |
| 2  | <i>Ddr</i>        | <i>Discoidin Domain Receptor Tyrosine Kinase 1/2</i>    | KH.C9.371         |
| 3  | <i>Ebf</i>        | <i>Collier/Olf/EBF; COE</i>                             | KH.L24.10         |
| 4  | <i>Eph.a</i>      | <i>Ephrin type-A receptor.a; Eph1</i>                   | KH.C1.404         |
| 5  | <i>Ets.b</i>      | <i>Ets/Pointed2</i>                                     | KH.C11.10         |
| 6  | <i>Fgf4/6</i>     | <i>Fibroblast growth factor 4/6; FGF, unassigned 1</i>  | KH.C1.697         |
| 7  | <i>Fgf8/17/18</i> | <i>Fibroblast growth factor 8/17/18</i>                 | KH.C5.5           |
| 8  | <i>Fgfr</i>       | <i>Fibroblast growth factor receptor</i>                | KH.S742.2         |
| 9  | <i>Foxf</i>       | <i>FoxF</i>                                             | KH.C3.170         |
| 10 | <i>Foxg-r</i>     | <i>Foxg-related; Orphan Fox-4; Ci-ZF248</i>             | KH.C5.74          |
| 11 | <i>Fzd5/8</i>     | <i>Frizzled5/8</i>                                      | KH.C9.260         |
| 12 | <i>Gata4/5/6</i>  | <i>GATA-a</i>                                           | KH.L20.1          |
| 13 | <i>Hand</i>       | <i>Heart And Neural Crest Derivatives Expressed 1/2</i> | KH.C14.604        |
| 14 | <i>Hand-r</i>     | <i>Hand-related; Hand-like; NoTrlc</i>                  | KH.C1.1116        |
| 15 | <i>Htr7-r</i>     | <i>5-Hydroxytryptamine Receptor 7-related</i>           | KH.S555.1         |
| 16 | <i>Isl</i>        | <i>Islet1/2</i>                                         | KH.L152.2         |
| 17 | <i>Lef1</i>       | <i>Lef/TCF</i>                                          | KH.C6.71          |
| 18 | <i>Mrf</i>        | <i>Muscle regulatory factor; MyoD</i>                   | KH.C14.307        |
| 19 | <i>Neurog</i>     | <i>Neurogenin; Ngn</i>                                  | KH.C6.129         |
| 20 | <i>Nk4</i>        | <i>Nkx2-5; Tinman</i>                                   | KH.C8.482         |
| 21 | <i>Rhod/f</i>     | <i>RhoD/F; Rif</i>                                      | KH.C1.129         |
| 22 | <i>Tle.b</i>      | <i>Groucho2</i>                                         | KH.L96.50         |
| 23 | <i>Tll</i>        | <i>Tolloid-like; Tolloid</i>                            | KH.C12.156        |

727

728

729

730

731

732

733

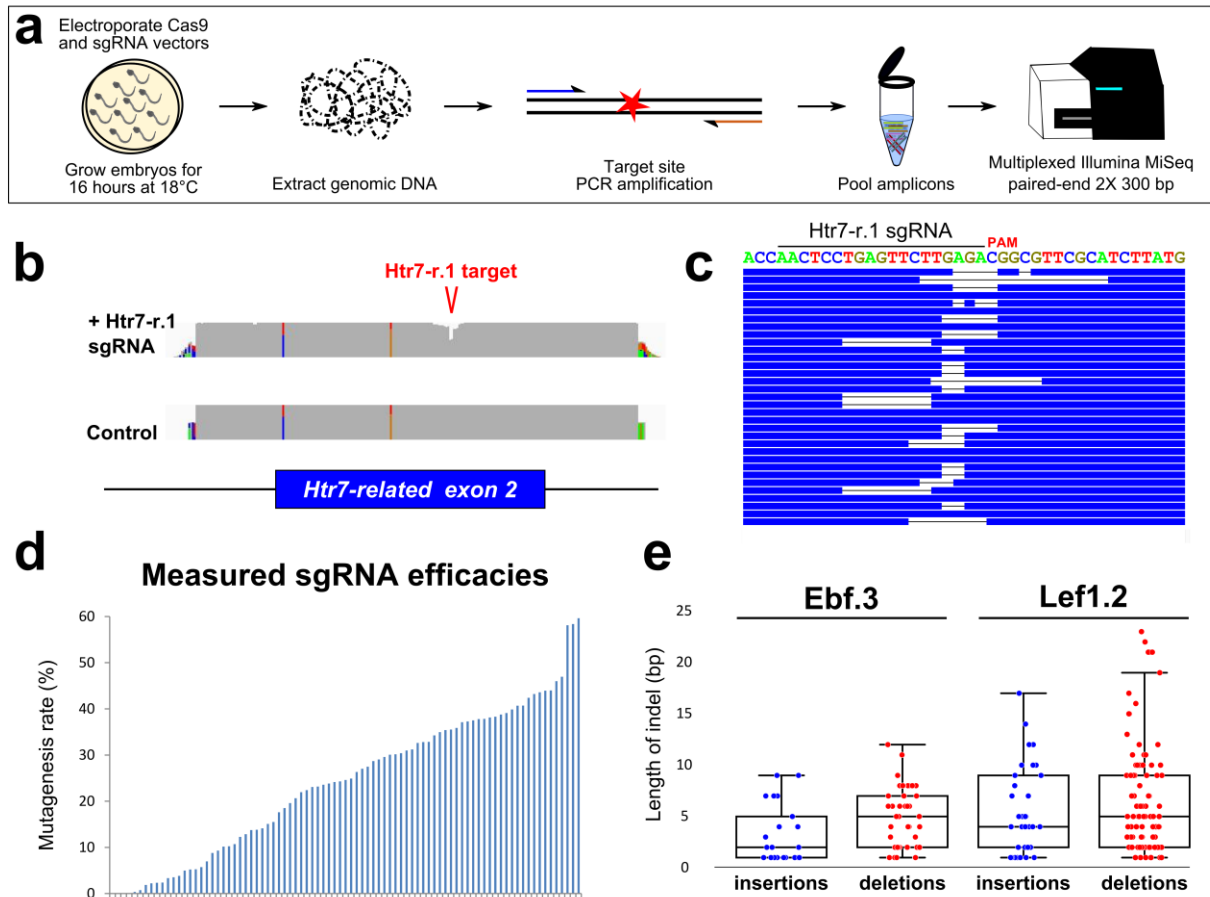

734

735 **Figure 1. Next-Generation Sequencing approach to validating sgRNAs for use in *Ciona* embryos**

736 a) Schematic for next-generation sequencing approach to measuring mutagenesis efficacies of sgRNAs expressed in

737 F0 *Ciona* embryos. See results and materials and methods for details. b) Representative view in IGV browser of

738 coverage (grey areas) of sequencing reads aligned to the reference genome. “Dip” in coverage of reads from

739 embryos co-electroporated with *Eef1a1*>*Cas9* and *U6*>*Htr7-r.1* sgRNA vector indicates CRISPR/Cas9-induced

740 indels around the sgRNA target site, in the 2<sup>nd</sup> exon of the *Htr7-related* (*Htr7-r*) gene. Colored bars in coverage

741 indicate single-nucleotide polymorphisms/mismatches relative to reference genome. c) Diagram representing a stack

742 of reads bearing indels of various types and sizes, aligned to exact target sequence of Htr7-r.1 sgRNA. d) Plot of

743 mutagenesis efficacy rates measured for all sgRNAs, ordered from lowest (0%) to highest (59.63%). Each bar

744 represents a single sgRNA. e) Box-and-whisker plots showing the size distribution of insertions and deletions

745 caused by *Ebf.3* or *Lef1.2* sgRNAs.

746

747



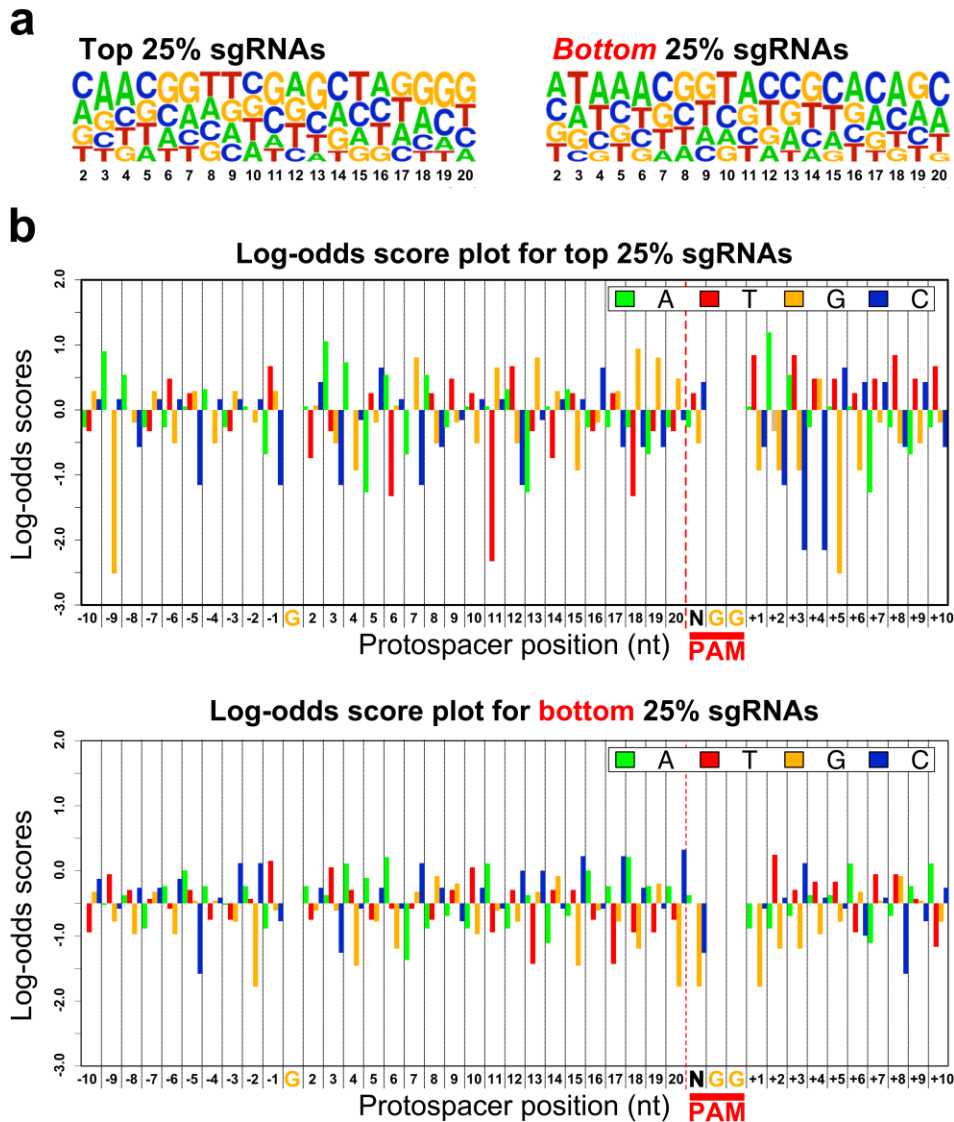

748

749 **Figure 2. Correlations between sgRNA sequence composition and mutagenesis efficacy**

750 **a)** WebLogos representing the nucleotide composition at each variable position of the protospacer (nt 2-20, X axis),

751 in top 25% and bottom 25% performing sgRNAs. **b)** Log-odds scores depicting the frequency of occurrence for

752 nucleotides in the top 25% and bottom 25% sgRNAs, at all positions of the protospacer, PAM, and flanking regions.

753 Position “1” of the protospacer has been omitted from the analysis, due to this always being “G” for PolIII-

754 dependent transcription of U6-promoter-based vectors. Likewise, the “GG” of the PAM has also been omitted, as

755 this sequence is invariant in all targeted sites. Positive and negative log-odds scores reflect abundance and depletion,

756 respectively, of a specific nucleotide at a given position relative to its random occurrence in our sample space. See

757 **materials and methods** for details.

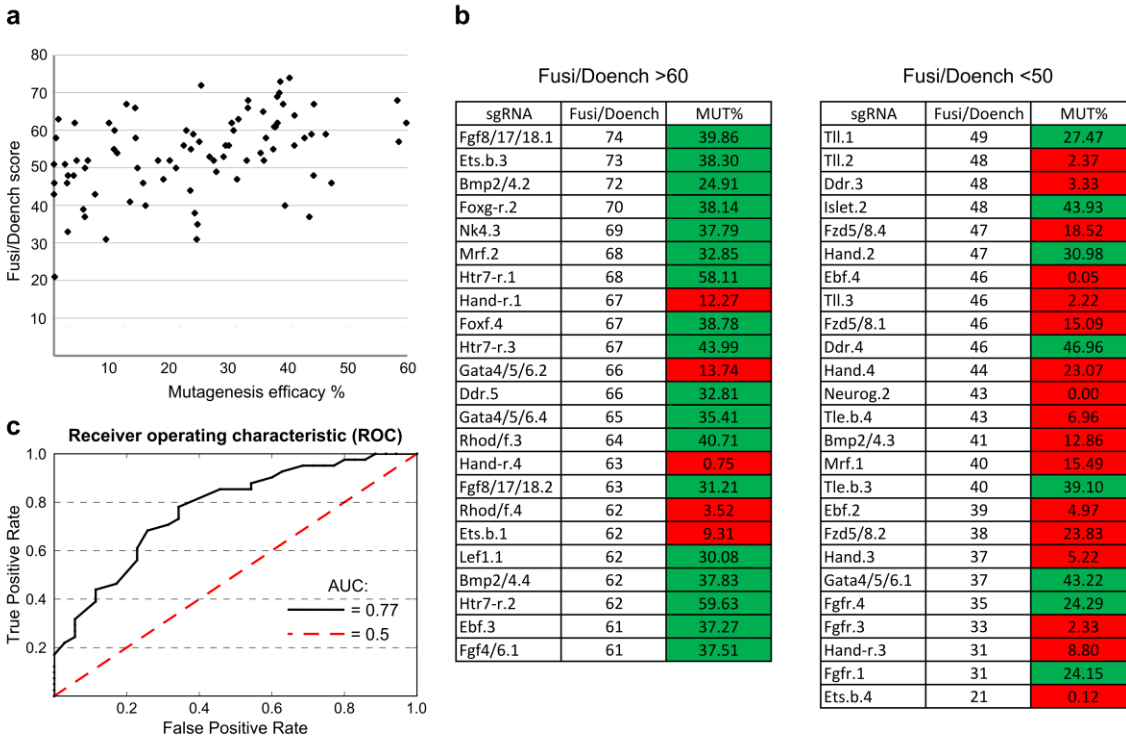

758

759 **Figure 3. Using Fusi/Doench scores to predict mutagenesis efficacies of sgRNAs in *Ciona***

760 **a)** Mutagenesis efficacy rate of each sgRNA plotted against the same sgRNA’s Fusi/Doench algorithm score,  
 761 obtained from CRISPOR. The Spearman’s rank correlation coefficient ( $\rho$ ) is 0.435 ( $p = 3.884e-05$ ). **b)** sgRNAs  
 762 grouped by sorted Fusi/Doench predicted scores (left: >60; right: <50). 18 of 23 sgRNAs of Fusi/Doench score over  
 763 60 showed a measured mutagenesis efficacy (MUT%) over 24%, classified as “good” (shaded green). In contrast,  
 764 only 4 from the same set had a MUT% under 24%, classified as “bad”. “Good” and “bad” classifications were based  
 765 on phenotype frequency in F0 (see text for details). Out of 25 sgRNAs with Fusi/Doench score under 50, 17 were  
 766 “bad”, while only 8 were “good”. **c)** A Receiver Operating Characteristic (ROC) curve assesses the credibility of  
 767 using Fusi/Doench score cutoff (from 0 to 100) to classify sgRNAs as either “good” (>24.5% efficacy) or “bad”  
 768 ( $\leq 24.5\%$  efficacy). Using Fusi/Doench cutoffs as such a classifier returns an AUC of 0.77 (black line), while an  
 769 AUC of 0.5 (dashed red line) represents the performance of a classifier solely based on random chance. The optimal  
 770 Fusi/Doench cutoff (above which a score is likely to indicate “good” sgRNAs) was found to be between 50 and 55.  
 771 See **materials and methods** and **Supplementary Table 2** for details.

772

773

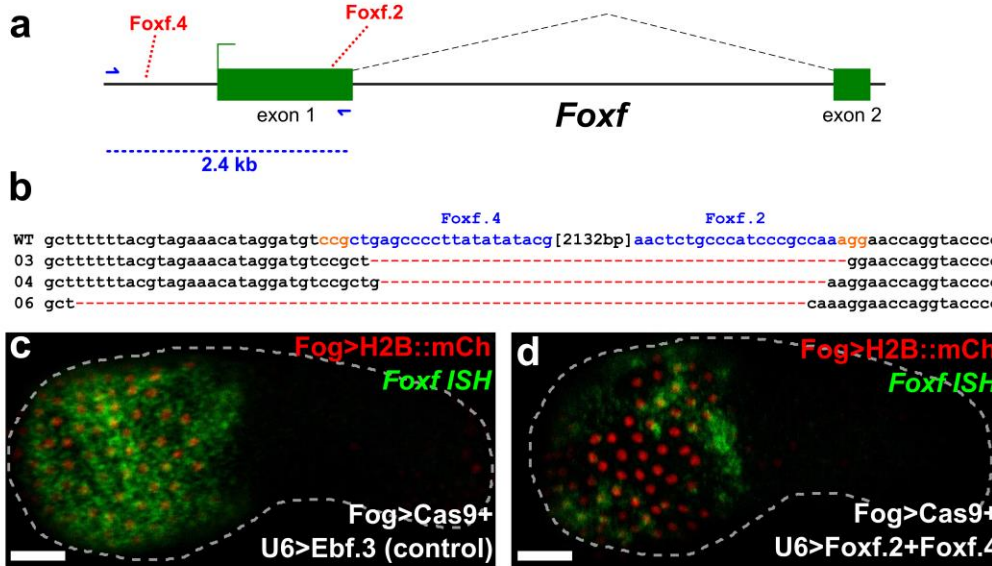

774

775 **Figure 4. Combinatorial targeting of *Foxf* results in large deletions**

776 **a)** Diagram of *Foxf* locus, showing positions targeted by *Foxf.4* and *Foxf.2* sgRNAs. *Foxf.4* targets a non-coding,  
777 *cis*-regulatory sequence 881 base pairs (bp) upstream of the transcription start site of *Foxf*. *Foxf.2* targets a coding  
778 sequence in exon 1 of *Foxf*. The distance between the target sites is 2132 bp, and encompasses most of exon 1, the  
779 core promoter, and *cis*-regulatory modules that drive *Foxf* expression in the head epidermis and trunk ventral cells  
780 (TVCs) (BEH *et al.* 2007). Blue arrows indicate primers used to amplify the region between the target sites. In wild-  
781 type embryos, the resulting PCR product is ~2.4 kilobase pairs (kbp). **b)** Alignment of cloned PCR products  
782 amplified using the primers indicated in (a), from wild-type (wt) embryos, and from embryos electroporated with 25  
783  $\mu$ g *Eef1a1>nls::Cas9::nls* and 50  $\mu$ g each of *U6>Foxf.2* and *U6>Foxf.4*. Colonies 03, 04, and 06 shown containing  
784 large deletions between the approximate sites targeted by the two sgRNAs, indicating non-homologous end-joining  
785 (NHEJ) repair from two separate double stranded break events as a result of combinatorial action of *Foxf.2* and  
786 *Foxf.4* sgRNAs. **c)** *In situ* hybridization for *Foxf* (green) showing strong expression throughout the head epidermis  
787 in embryos electroporated with 10  $\mu$ g *Fog>H2B::mCherry* (red), 50  $\mu$ g *Fog>nls::Cas9::nls* and 45  $\mu$ g of *U6>Ebf.3*.  
788 *Foxf* expression is essentially wild-type, as *Ebf* function is not required for activation of *Foxf* in the epidermis. **d)** *In*  
789 *situ* hybridization for *Foxf* (green) showing patchy expression in the head epidermis of embryos electroporated with  
790 10  $\mu$ g *Fog>H2B::mCherry* (red), 50  $\mu$ g *Fog>nls::Cas9::nls* and 45  $\mu$ g each of *U6>Foxf.2* and *U6>Foxf.4*. Loss of  
791 *in situ* signal in some transfected head epidermis cells indicates loss of *Foxf* activation, presumably through deletion  
792 of all or part of the upstream *cis*-regulatory sequences by CRISPR/Cas9. Scale bars = 25  $\mu$ m.

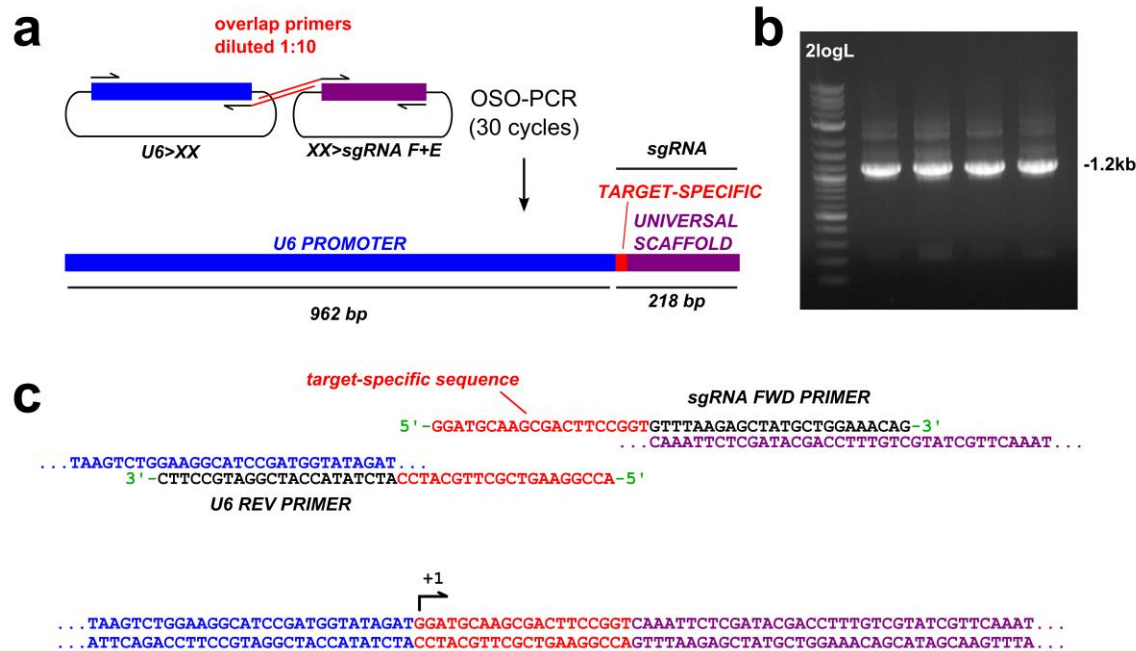

793

794 **Figure 5. One-step Overlap Polymerase Chain Reaction (OSO-PCR) for the high-throughput**

795 **construction of sgRNA expression cassette libraries**

796 a) Diagram of OSO-PCR for amplification of *U6>sgRNA* expression cassettes in which the target-specific sequence

797 of each (red) is encoded in complementary overhangs attached to universal primers. 1:10 dilution of these primers

798 ensures that the overlap product, the entire *U6>sgRNA* cassette, is preferentially amplified (see methods for details).

799 b) Agarose gel electrophoresis showing products of four different *U6>sgRNA* OSO-PCRs. The desired product is

800 ~1.2 kilobase pairs (kbp) long. 2logL = NEB 2-Log DNA ladder. c) Detailed diagram of how the overlap primers

801 form a target-specific bridge that fuses universal *U6* promoter and sgRNA scaffold sequences.

802

803

804

805

806

807

808

809

810

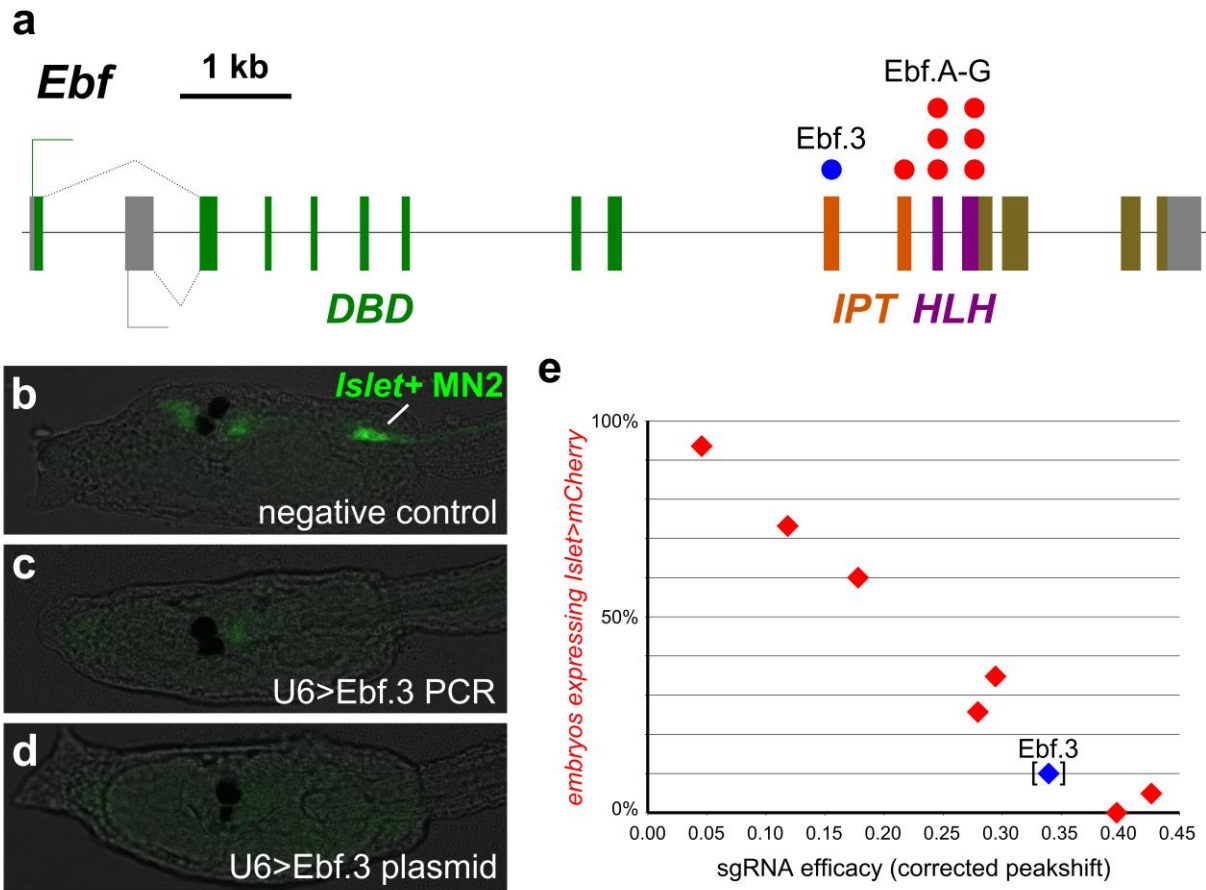

811

812 **Figure 6. Linear relationship between sgRNA efficacy and mutant phenotype frequency in F0**

813 **a)** Diagram of *Ebf* locus, showing exons coding for DNA-binding (DBD), IPT, and helix-loop-helix (HLH)

814 domains. Colored dots indicate exons targeted by the *Ebf*-targeting sgRNAs used to validate the OSO-PCR method

815 for genetic loss-of-function. **b)** Larvae co-electroporated with *Sox1/2/3>nls::Cas9::nls*, *Islet>eGFP*, and 25  $\mu$ l (~2.5

816  $\mu$ g) unpurified *U6>NegativeControl* PCR or **c)** 25  $\mu$ l (~2.5  $\mu$ g) unpurified *U6>Ebf.3* PCR, or **d)** 25  $\mu$ g *U6>Ebf.3*

817 plasmid. *Islet>eGFP* reporter plasmid is normally expressed in MN2 motor neurons (“*Islet+ MN2*”, green), which is

818 dependent on *Ebf* function. *Islet>eGFP* was expressed in MN2s in 75 of 100 negative control embryos. In embryos

819 electroporated with unpurified *U6>Ebf.3* PCR products or *U6>Ebf.3* plasmid, only 16 of 100 and 17 of 100

820 embryos, respectively, had *Islet>eGFP* expression in MN2s. This indicates similar loss of *Ebf* function *in vivo* by

821 either unpurified PCR or purified plasmid sgRNA delivery method. **c)** Plot comparing mutagenesis efficacies of the

822 OSO-PCR-generated sgRNAs indicated in panel (a) (measured by Sanger sequencing, see text for details) and the

823 ability to cause the *Ebf* loss-of-function phenotype (loss of *Islet>mCherry* reporter expression in MN2s in

824 *Sox1/2/3>H2B::eGFP+* embryos). The nearly perfect inverse correlation between sgRNA mutagenesis efficacy and  
825 *Islet>mCherry* expression indicates a linear relationship between sgRNA activity and mutant phenotype frequency  
826 in electroporated embryos. Ebf.3 sgRNA data point is bracketed, because its mutagenesis efficacy was not measured  
827 by Sanger sequencing but comes from the NGS data collected in this study.

828

829

830

831

832

833

834

835

836

837

838

839

840

841

842

843

844

845

846

847

848

849

**a**

Fusi/Doench score

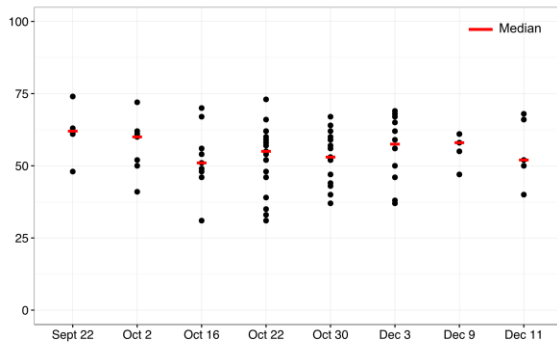

Mut%

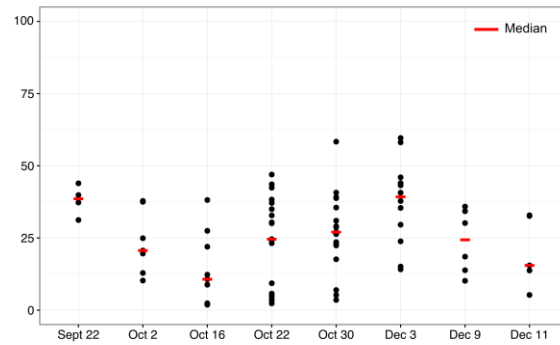

850

**b**

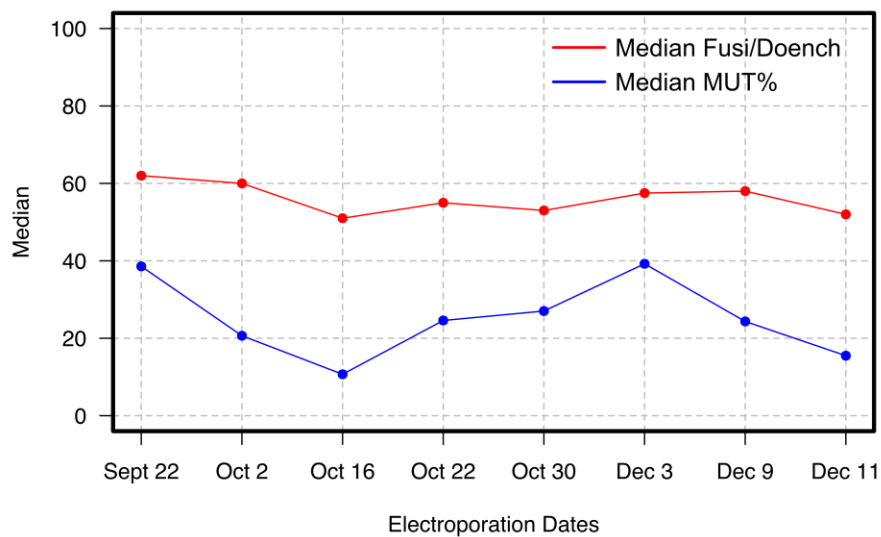

851

852 **Supplementary Figure 1. Fusi/Doench scores and mutagenesis efficacies plotted by electroporation**

853 **date**

854 **a)** Fusi/Doench scores (left) and mutagenesis efficacy estimates ("Mut%", right) for individual sgRNAs tested,

855 grouped by electroporation date. **b)** Plot of median values indicated in (a). While variation in Fusi/Doench score

856 within and between dates should be random, mut% could in theory be affected by electroporation efficiency

857 variation, or embryo batch effects. Despite the narrower range of Fusi/Doench scores, trends were similar for both

858 datasets.



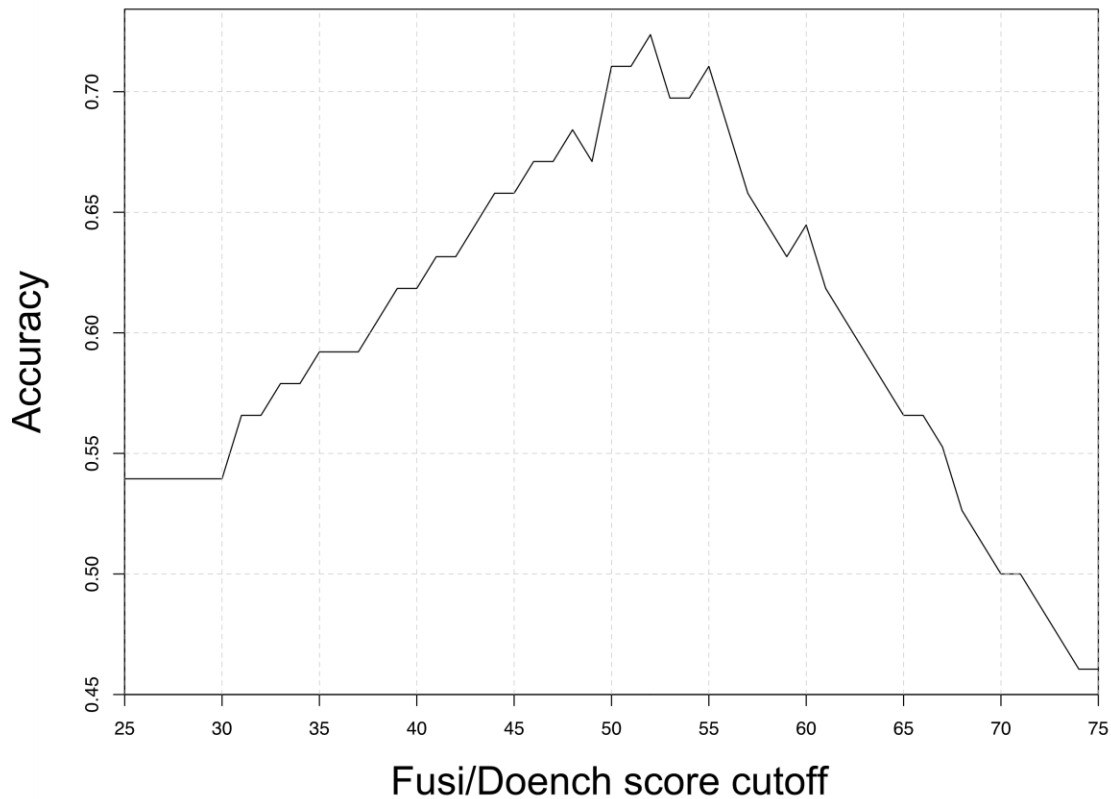

859

860 **Supplementary Figure 2. Accuracy of good vs. bad sgRNA classification using different**

861 **Fusi/Doench score cutoffs**

862 Accuracy was defined as the percentage of correctly classified instances (True Positives + True Negatives)/(True

863 Positives + True Negatives + False Positives + False Negatives). The maximum accuracy was 0.72, using a cutoff of

864 52. See **Supplementary Table 2** for data.

865

866

867

868

869

870

871

872





## eGFP mRNA *in situ* hybridization

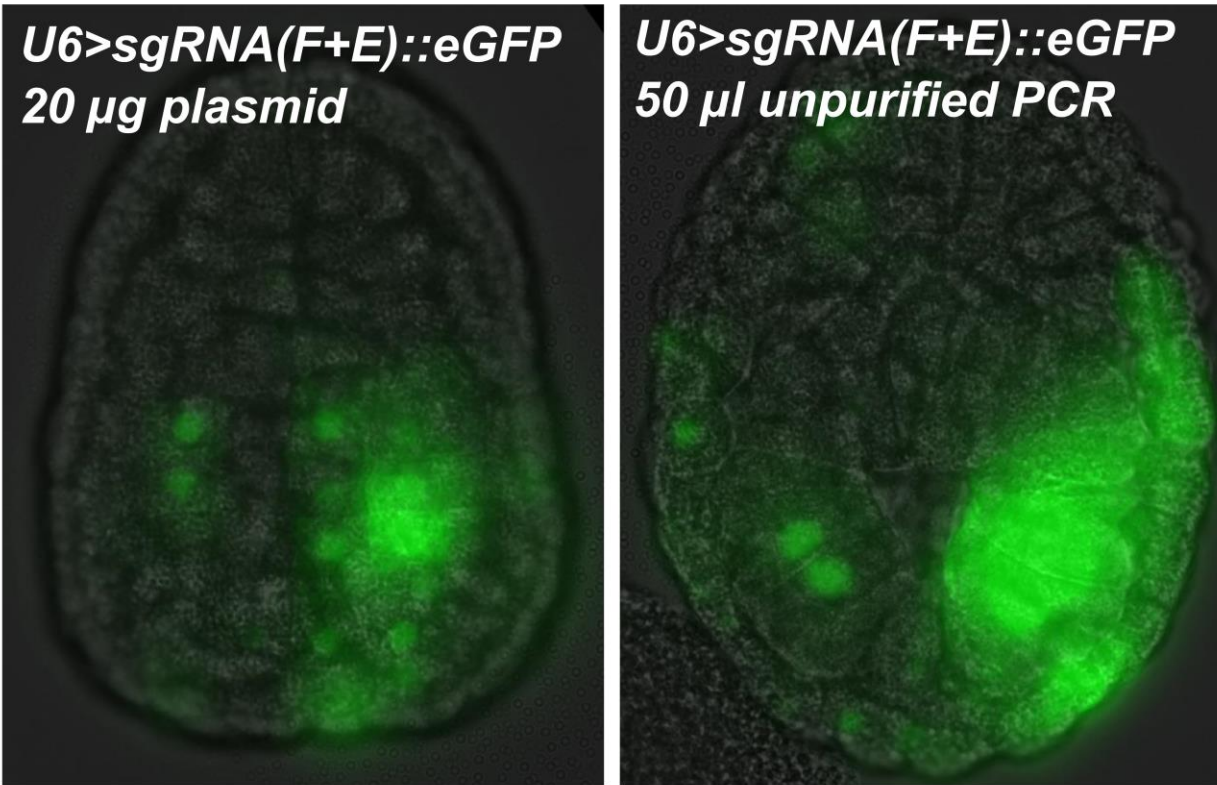

890

891 **Supplementary Figure 3. Evidence of *in vivo* transcription from electroporated, unpurified PCR**  
892 **products**

893 *In situ* hybridization of *eGFP* in late gastrula/early neural stage embryos electroporated with either *U6>*  
894 *sgRNA(F+E)::eGFP* plasmid (20 µg) or unpurified PCR product (50 µl, ~5 µg DNA).

895

896

897

898

899

900

901

902

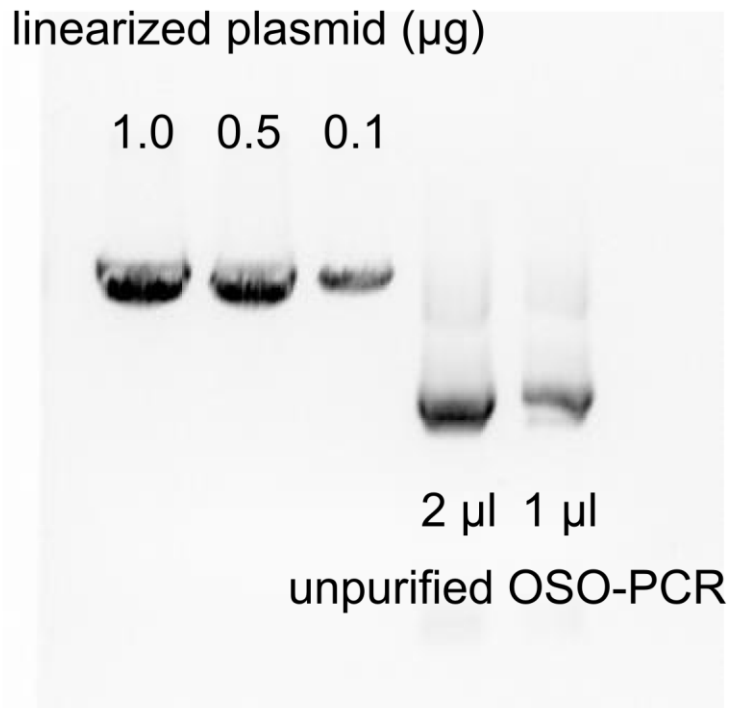

903

904

905

### 906 **Supplementary Figure 5. Quantification of OSO-PCR products**

907 Image of gel electrophoresis of varying amounts of linearized plasmid and unpurified OSO-PCR products. Pixel

908 intensity analysis in ImageJ was performed as previously described (STOLFI *et al.* 2014), and indicated that the

909 sgRNA expression cassette in unpurified OSO-PCR reactions are at a concentration of approximately 100 ng/ $\mu\text{l}$ .

910

911

912

913

914

915

916

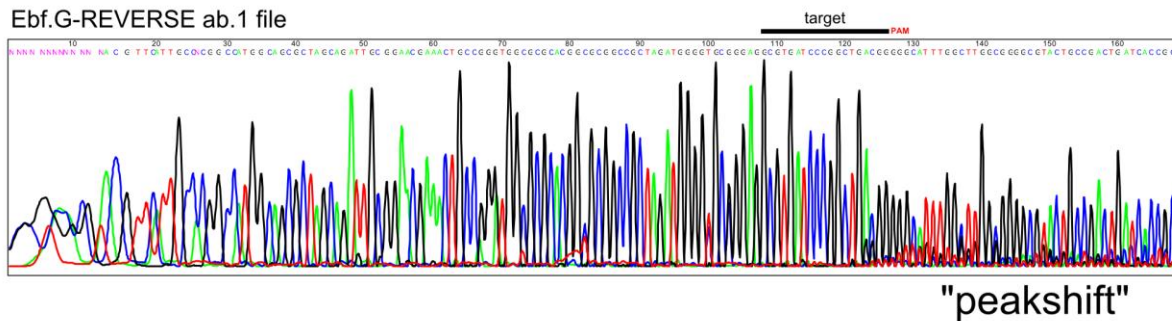

917

918 **Supplementary Figure 6. Detection of CRISPR/Cas9-induced indels by Sanger sequencing**

919 Chromatogram of *Ebf* amplicon from embryos targeted using the Ebf.G sgRNA. “Peakshift” shows superimposed

920 sequence peaks as a result of the resulting mix of mutant alleles bearing short indels around the Ebf.G target site and

921 PAM. This peakshift can be quantified and corrected to produce a precise quantification of CRISPR/Cas9-mediated

922 mutagenesis (see **Materials and methods** for details).

923

924

925

926

927

928

929

930

931

932

933

934

935

936

937 REFERENCES

- 938 Abdul-Wajid, S., H. Morales-Diaz, Stephanie M. Khairallah and William C. Smith, 2015 T-  
939 type Calcium Channel Regulation of Neural Tube Closure and EphrinA/EPHA  
940 Expression. *Cell Reports* 13: 829-839.
- 941 Aken, B. L., S. Ayling, D. Barrell, L. Clarke, V. Curwen *et al.*, 2016 The Ensembl gene  
942 annotation system. Database 2016.
- 943 Bae, S., J. Kweon, H. S. Kim and J.-S. Kim, 2014 Microhomology-based choice of Cas9  
944 nuclease target sites. *Nature methods* 11: 705-706.
- 945 Barrangou, R., C. Fremaux, H. Deveau, M. Richards, P. Boyaval *et al.*, 2007 CRISPR provides  
946 acquired resistance against viruses in prokaryotes. *Science* 315: 1709-1712.
- 947 Beh, J., W. Shi, M. Levine, B. Davidson and L. Christiaen, 2007 FoxF is essential for FGF-  
948 induced migration of heart progenitor cells in the ascidian *Ciona intestinalis*.  
949 *Development* 134: 3297-3305.
- 950 Bellas, J., R. Beiras and E. Vázquez, 2003 A standardisation of *Ciona intestinalis* (Chordata,  
951 Ascidiacea) embryo-larval bioassay for ecotoxicological studies. *Water Research* 37:  
952 4613-4622.
- 953 Brozovic, M., C. Martin, C. Dantec, D. Dauga, M. Mendez *et al.*, 2015 ANISEED 2015: a digital  
954 framework for the comparative developmental biology of ascidians. *Nucleic acids*  
955 *research*: gkv966.
- 956 Brunetti, R., C. Gissi, R. Pennati, F. Caicci, F. Gasparini *et al.*, 2015 Morphological evidence  
957 that the molecularly determined *Ciona intestinalis* type A and type B are different  
958 species: *Ciona robusta* and *Ciona intestinalis*. *Journal of Zoological Systematics and*  
959 *Evolutionary Research* 53: 186-193.
- 960 Chari, R., P. Mali, M. Moosburner and G. M. Church, 2015 Unraveling CRISPR-Cas9 genome  
961 engineering parameters via a library-on-library approach. *Nature methods* 12: 823-  
962 826.
- 963 Chen, B., L. A. Gilbert, B. A. Cimini, J. Schnitzbauer, W. Zhang *et al.*, 2013 Dynamic imaging of  
964 genomic loci in living human cells by an optimized CRISPR/Cas system. *Cell* 155:  
965 1479-1491.
- 966 Cho, S. W., S. Kim, Y. Kim, J. Kweon, H. S. Kim *et al.*, 2014 Analysis of off-target effects of  
967 CRISPR/Cas-derived RNA-guided endonucleases and nickases. *Genome research* 24:  
968 132-141.
- 969 Christiaen, L., E. Wagner, W. Shi and M. Levine, 2009 The sea squirt *Ciona intestinalis*. *Cold*  
970 *Spring Harbor protocols* 2009: pdb.emo138.
- 971 Cong, L., F. A. Ran, D. Cox, S. Lin, R. Barretto *et al.*, 2013 Multiplex genome engineering using  
972 CRISPR/Cas systems. *Science* 339: 819-823.
- 973 Cota, C. D., and B. Davidson, 2015 Mitotic Membrane Turnover Coordinates Differential  
974 Induction of the Heart Progenitor Lineage. *Developmental cell* 34: 505-519.
- 975 Crooks, G. E., G. Hon, J.-M. Chandonia and S. E. Brenner, 2004 WebLogo: a sequence logo  
976 generator. *Genome research* 14: 1188-1190.
- 977 Dickinson, D. J., J. D. Ward, D. J. Reiner and B. Goldstein, 2013 Engineering the  
978 *Caenorhabditis elegans* genome using Cas9-triggered homologous recombination.  
979 *Nature methods* 10: 1028-1034.
- 980 Diogo, R., R. G. Kelly, L. Christiaen, M. Levine, J. M. Ziermann *et al.*, 2015 A new heart for a  
981 new head in vertebrate cardiopharyngeal evolution. *Nature* 520: 466-473.

- 982 Doench, J. G., N. Fusi, M. Sullender, M. Hegde, E. W. Vaimberg *et al.*, 2016 Optimized sgRNA  
983 design to maximize activity and minimize off-target effects of CRISPR-Cas9. *Nature*  
984 *biotechnology*.
- 985 Doench, J. G., E. Hartenian, D. B. Graham, Z. Tothova, M. Hegde *et al.*, 2014 Rational design of  
986 highly active sgRNAs for CRISPR-Cas9-mediated gene inactivation. *Nature*  
987 *biotechnology*.
- 988 Fu, Y., J. A. Foden, C. Khayter, M. L. Maeder, D. Reyon *et al.*, 2013 High-frequency off-target  
989 mutagenesis induced by CRISPR-Cas nucleases in human cells. *Nature biotechnology*  
990 31: 822-826.
- 991 Fu, Y., J. D. Sander, D. Reyon, V. M. Cascio and J. K. Joung, 2014 Improving CRISPR-Cas  
992 nuclease specificity using truncated guide RNAs. *Nature biotechnology* 32: 279-284.
- 993 Fusi, N., I. Smith, J. Doench and J. Listgarten, 2015 In Silico Predictive Modeling of  
994 CRISPR/Cas9 guide efficiency. *bioRxiv*: 021568.
- 995 Gagnon, J. A., E. Valen, S. B. Thyme, P. Huang, L. Ahkmetova *et al.*, 2014 Efficient  
996 mutagenesis by Cas9 protein-mediated oligonucleotide insertion and large-scale  
997 assessment of single-guide RNAs.
- 998 Gantz, V. M., and E. Bier, 2015 The mutagenic chain reaction: A method for converting  
999 heterozygous to homozygous mutations. *Science* 348: 442-444.
- 1000 Haeussler, M., K. Schönig, H. Eckert, A. Eschstruth, J. Mianné *et al.*, 2016 Evaluation of off-  
1001 target and on-target scoring algorithms and integration into the guide RNA selection  
1002 tool CRISPOR. *Genome Biology* 17: 148.
- 1003 Hinz, J. M., M. F. Laughery and J. J. Wyrick, 2015 Nucleosomes Inhibit Cas9 Endonuclease  
1004 Activity in Vitro. *Biochemistry* 54: 7063-7066.
- 1005 Hirano, T., and H. Nishida, 1997 Developmental Fates of Larval Tissues after  
1006 Metamorphosis in Ascidian *Halocynthia roretzi*. *Developmental biology* 192: 199-  
1007 210.
- 1008 Horlbeck, M. A., L. B. Witkowsky, B. Guglielmi, J. M. Replogle, L. A. Gilbert *et al.*, 2016  
1009 Nucleosomes impede Cas9 access to DNA in vivo and in vitro. *Elife* 5: e12677.
- 1010 Hoshino, Z. i., and T. Tokioka, 1967 An unusually robust *Ciona* from the northeastern coast  
1011 of Honsyu Island, Japan.
- 1012 Hotta, K., K. Mitsuhara, H. Takahashi, K. Inaba, K. Oka *et al.*, 2007 A web-based interactive  
1013 developmental table for the ascidian *Ciona intestinalis*, including 3D real-image  
1014 embryo reconstructions: I. From fertilized egg to hatching larva. *Developmental*  
1015 *Dynamics* 236: 1790-1805.
- 1016 Housden, B. E., A. J. Valvezan, C. Kelley, R. Sopko, Y. Hu *et al.*, 2015 Identification of potential  
1017 drug targets for tuberous sclerosis complex by synthetic screens combining CRISPR-  
1018 based knockouts with RNAi. *Science signaling* 8: rs9.
- 1019 Hsu, P. D., D. A. Scott, J. A. Weinstein, F. A. Ran, S. Konermann *et al.*, 2013 DNA targeting  
1020 specificity of RNA-guided Cas9 nucleases. *Nature biotechnology* 31: 827-832.
- 1021 Hwang, W. Y., Y. Fu, D. Reyon, M. L. Maeder, S. Q. Tsai *et al.*, 2013 Efficient genome editing in  
1022 zebrafish using a CRISPR-Cas system. *Nature biotechnology* 31: 227-229.
- 1023 Imai, K. S., K. Hino, K. Yagi, N. Satoh and Y. Satou, 2004 Gene expression profiles of  
1024 transcription factors and signaling molecules in the ascidian embryo: towards a  
1025 comprehensive understanding of gene networks. *Development* 131: 4047-4058.
- 1026 Isaac, R. S., F. Jiang, J. A. Doudna, W. A. Lim, G. J. Narlikar *et al.*, 2016 Nucleosome breathing  
1027 and remodeling constrain CRISPR-Cas9 function. *eLife* 5: e13450.



- 1028 Jinek, M., K. Chylinski, I. Fonfara, M. Hauer, J. A. Doudna *et al.*, 2012 A programmable dual-  
1029 RNA-guided DNA endonuclease in adaptive bacterial immunity. *Science* 337: 816-  
1030 821.
- 1031 Jinek, M., A. East, A. Cheng, S. Lin, E. Ma *et al.*, 2013 RNA-programmed genome editing in  
1032 human cells. *eLife* 2.
- 1033 Kaplan, N., F. Razy-Krajka and L. Christiaen, 2015 Regulation and evolution of  
1034 cardiopharyngeal cell identity and behavior: insights from simple chordates.  
1035 *Current opinion in genetics & development* 32: 119-128.
- 1036 Kawai, N., H. Ochiai, T. Sakuma, L. Yamada, H. Sawada *et al.*, 2012 Efficient targeted  
1037 mutagenesis of the chordate *Ciona intestinalis* genome with zinc - finger nucleases.  
1038 *Development, growth & differentiation* 54: 535-545.
- 1039 Koike-Yusa, H., Y. Li, E.-P. Tan, M. D. C. Velasco-Herrera and K. Yusa, 2014 Genome-wide  
1040 recessive genetic screening in mammalian cells with a lentiviral CRISPR-guide RNA  
1041 library. *Nature biotechnology* 32: 267-273.
- 1042 Langmead, B., and S. L. Salzberg, 2012 Fast gapped-read alignment with Bowtie 2. *Nature*  
1043 *methods* 9: 357-359.
- 1044 Li, H., and R. Durbin, 2009 Fast and accurate short read alignment with Burrows–Wheeler  
1045 transform. *Bioinformatics* 25: 1754-1760.
- 1046 Li, H., B. Handsaker, A. Wysoker, T. Fennell, J. Ruan *et al.*, 2009 The sequence  
1047 alignment/map format and SAMtools. *Bioinformatics* 25: 2078-2079.
- 1048 Mali, P., L. Yang, K. M. Esvelt, J. Aach, M. Guell *et al.*, 2013 RNA-guided human genome  
1049 engineering via Cas9. *Science* 339: 823-826.
- 1050 Moreno-Mateos, M. A., C. E. Vejnar, J.-D. Beaudoin, J. P. Fernandez, E. K. Mis *et al.*, 2015  
1051 CRISPRscan: designing highly efficient sgRNAs for CRISPR-Cas9 targeting in vivo.  
1052 *Nat Meth* 12: 982-988.
- 1053 Naito, Y., K. Hino, H. Bono and K. Ui-Tei, 2015 CRISPRdirect: software for designing  
1054 CRISPR/Cas guide RNA with reduced off-target sites. *Bioinformatics* 31: 1120-1123.
- 1055 Nielsen, S., Y. Yuzenkova and N. Zenkin, 2013 Mechanism of Eukaryotic RNA Polymerase III  
1056 Transcription Termination. *Science* 340: 1577-1580.
- 1057 Nishida, H., 1987 Cell lineage analysis in ascidian embryos by intracellular injection of a  
1058 tracer enzyme: III. Up to the tissue restricted stage. *Developmental biology* 121:  
1059 526-541.
- 1060 Nishiyama, A., and S. Fujiwara, 2008 RNA interference by expressing short hairpin RNA in  
1061 the *Ciona intestinalis* embryo. *Development, growth & differentiation* 50: 521-529.
- 1062 Paix, A., Y. Wang, H. E. Smith, C.-Y. S. Lee, D. Calidas *et al.*, 2014 Scalable and versatile  
1063 genome editing using linear DNAs with microhomology to Cas9 Sites in  
1064 *Caenorhabditis elegans*. *Genetics* 198: 1347-1356.
- 1065 Pasini, A., A. Amiel, U. Rothbacher, A. Roure, P. Lemaire *et al.*, 2006 Formation of the  
1066 ascidian epidermal sensory neurons: insights into the origin of the chordate  
1067 peripheral nervous system. *PLoS Biology* 4: e225.
- 1068 Pattanayak, V., S. Lin, J. P. Guilinger, E. Ma, J. A. Doudna *et al.*, 2013 High-throughput  
1069 profiling of off-target DNA cleavage reveals RNA-programmed Cas9 nuclease  
1070 specificity. *Nature biotechnology* 31: 839-843.
- 1071 Raney, B. J., T. R. Dreszer, G. P. Barber, H. Clawson, P. A. Fujita *et al.*, 2014 Track data hubs  
1072 enable visualization of user-defined genome-wide annotations on the UCSC Genome  
1073 Browser. *Bioinformatics* 30: 1003-1005.

- 1074 Razy-Krajka, F., K. Lam, W. Wang, A. Stolfi, M. Joly *et al.*, 2014 Collier/OLF/EBF-Dependent  
1075 Transcriptional Dynamics Control Pharyngeal Muscle Specification from Primed  
1076 Cardiopharyngeal Progenitors. *Developmental cell* 29: 263-276.
- 1077 Ren, X., Z. Yang, J. Xu, J. Sun, D. Mao *et al.*, 2014 Enhanced specificity and efficiency of the  
1078 CRISPR/Cas9 system with optimized sgRNA parameters in *Drosophila*. *Cell reports*  
1079 9: 1151-1162.
- 1080 Robinson, J. T., H. Thorvaldsdóttir, W. Winckler, M. Guttman, E. S. Lander *et al.*, 2011  
1081 Integrative genomics viewer. *Nature biotechnology* 29: 24-26.
- 1082 Rothbacher, U., V. Bertrand, C. Lamy and P. Lemaire, 2007 A combinatorial code of maternal  
1083 GATA, Ets and  $\beta$ -catenin-TCF transcription factors specifies and patterns the early  
1084 ascidian ectoderm. *Development* 134: 4023-4032.
- 1085 Roy, S., and E. Schreiber, 2014 Detecting and quantifying low level gene variants in Sanger  
1086 sequencing traces using the ab1 Peak Reporter tool. *Journal of biomolecular*  
1087 *techniques: JBT* 25: S13.
- 1088 Ryan, K., Z. Lu and I. A. Meinertzhagen, 2016 The CNS connectome of a tadpole larva of  
1089 *Ciona intestinalis* (L.) highlights sidedness in the brain of a chordate sibling. *eLife* 5:  
1090 e16962.
- 1091 Sanjana, N. E., J. Wright, K. Zheng, O. Shalem, P. Fontanillas *et al.*, 2016 High-resolution  
1092 interrogation of functional elements in the noncoding genome. *bioRxiv*: 049130.
- 1093 Sasaki, H., K. Yoshida, A. Hozumi and Y. Sasakura, 2014 CRISPR/Cas9 - mediated gene  
1094 knockout in the ascidian *Ciona intestinalis*. *Development, growth & differentiation*  
1095 56: 499-510.
- 1096 Sasakura, Y., M. M. Suzuki, A. Hozumi, K. Inaba and N. Satoh, 2010 Maternal factor-mediated  
1097 epigenetic gene silencing in the ascidian *Ciona intestinalis*. *Molecular Genetics and*  
1098 *Genomics* 283: 99-110.
- 1099 Satoh, N., 2013 *Developmental genomics of ascidians*. John Wiley & Sons.
- 1100 Satou, Y., T. Kawashima, E. Shoguchi, A. Nakayama and N. Satoh, 2005 An integrated  
1101 database of the ascidian, *Ciona intestinalis*: towards functional genomics. *Zoological*  
1102 *science* 22: 837-843.
- 1103 Satou, Y., K. Mineta, M. Ogasawara, Y. Sasakura, E. Shoguchi *et al.*, 2008 Improved genome  
1104 assembly and evidence-based global gene model set for the chordate *Ciona*  
1105 *intestinalis*: new insight into intron and operon populations. *Genome Biology* 9:  
1106 R152.
- 1107 Schneider, T. D., and R. M. Stephens, 1990 Sequence logos: a new way to display consensus  
1108 sequences. *Nucleic acids research* 18: 6097-6100.
- 1109 Segade, F., C. Cota, A. Famiglietti, A. Cha and B. Davidson, 2016 Fibronectin contributes to  
1110 notochord intercalation in the invertebrate chordate, *Ciona intestinalis*. *EvoDevo* 7:  
1111 21.
- 1112 Shalem, O., N. E. Sanjana, E. Hartenian, X. Shi, D. A. Scott *et al.*, 2014 Genome-scale CRISPR-  
1113 Cas9 knockout screening in human cells. *Science* 343: 84-87.
- 1114 Stein, L. D., C. Mungall, S. Shu, M. Caudy, M. Mangone *et al.*, 2002 The Generic Genome  
1115 Browser: A Building Block for a Model Organism System Database. *Genome*  
1116 *Research* 12: 1599-1610.
- 1117 Stolfi, A., T. B. Gainous, J. J. Young, A. Mori, M. Levine *et al.*, 2010 Early chordate origins of  
1118 the vertebrate second heart field. *Science* 329: 565.



- 1119 Stolfi, A., S. Gandhi, F. Salek and L. Christiaen, 2014 Tissue-specific genome editing in *Ciona*  
1120 embryos by CRISPR/Cas9. *Development* 141: 4115-4120.
- 1121 Tolkin, T., and L. Christiaen, 2016 Rewiring of an ancestral Tbx1/10-Ebf-Mrf network for  
1122 pharyngeal muscle specification in distinct embryonic lineages. *Development* 143:  
1123 3852-3862.
- 1124 Treen, N., K. Yoshida, T. Sakuma, H. Sasaki, N. Kawai *et al.*, 2014 Tissue-specific and  
1125 ubiquitous gene knockouts by TALEN electroporation provide new approaches to  
1126 investigating gene function in *Ciona*. *Development* 141: 481-487.
- 1127 Urban, A., S. Neukirchen and K.-E. Jaeger, 1997 A rapid and efficient method for site-  
1128 directed mutagenesis using one-step overlap extension PCR. *Nucleic acids research*  
1129 25: 2227-2228.
- 1130 Wang, H., H. Yang, C. S. Shivalila, M. M. Dawlaty, A. W. Cheng *et al.*, 2013a One-step  
1131 generation of mice carrying mutations in multiple genes by CRISPR/Cas-mediated  
1132 genome engineering. *Cell* 153: 910-918.
- 1133 Wang, T., J. J. Wei, D. M. Sabatini and E. S. Lander, 2014 Genetic screens in human cells using  
1134 the CRISPR-Cas9 system. *Science* 343: 80-84.
- 1135 Wang, W., F. Razy-Krajka, E. Siu, A. Ketcham and L. Christiaen, 2013b NK4 antagonizes  
1136 Tbx1/10 to promote cardiac versus pharyngeal muscle fate in the ascidian second  
1137 heart field. *PLoS Biology* 11: e1001725.
- 1138 Wong, N., W. Liu and X. Wang, 2015 WU-CRISPR: characteristics of functional guide RNAs  
1139 for the CRISPR/Cas9 system. *Genome biology* 16: 1.
- 1140 Wu, X., D. A. Scott, A. J. Kriz, A. C. Chiu, P. D. Hsu *et al.*, 2014 Genome-wide binding of the  
1141 CRISPR endonuclease Cas9 in mammalian cells. *Nature biotechnology* 32: 670-676.
- 1142 Xu, H., T. Xiao, C.-H. Chen, W. Li, C. A. Meyer *et al.*, 2015 Sequence determinants of improved  
1143 CRISPR sgRNA design. *Genome research* 25: 1147-1157.
- 1144 Yates, A., W. Akanni, M. R. Amode, D. Barrell, K. Billis *et al.*, 2016 Ensembl 2016. *Nucleic*  
1145 *Acids Research* 44: D710-D716.
- 1146

1147

1148

1149

1150

1151

1152

1153

1154

1155

1156

1157

1158

1159

1160 **Supplemental Protocol**

1161

1162 **ONE-STEP OVERLAP PCR (OSO-PCR) TO MAKE READY-TO-ELECTROPORATE SINGLE GUIDE RNA (sgRNA)**

1163 **EXPRESSION CASSETTES – updated 09/21/2016**

1164

1165 **Companion manuscript:**

1166 Evaluation and rational design of guide RNAs for efficient CRISPR/Cas9-mediated  
1167 mutagenesis in *Ciona*

1168 Shashank Gandhi, Maximilian Haeussler, Florian Razy-Krajka, Lionel Christiaen, and Alberto Stolfi

1169

1170 Primers for OSO-PCR ready to be ordered can be obtained from the CRISPOR sgRNA prediction and  
1171 design website (<http://crispor.tefor.net>), which also checks for known single-nucleotide polymorphisms  
1172 (SNPs) and potential off-targets in the genome. You can also check for polymorphisms using the Kyoto  
1173 University Ghost Database genome browser (<http://ghost.zool.kyoto-u.ac.jp/cgi-bin/gb2/gbrowse/kh/>).  
1174 You should avoid sgRNAs targeting known SNPs or naturally occurring indels, since Cas9 cutting depends  
1175 on perfect target sequence match. To design OSO-PCR primers *de novo*, follow the instructions:

1176

1177 1- Select your target, as identified by online tools such as CRISPOR (see above).

1178

1179 target PAM  
1180 **. . . TCAACCAACTGAGGGTTGGACAACAGGTGGAGCAACAGT . . .**

1181

1182 2- A target (the protospacer) is given as N(20). If the target sequence contains too many T's (three or  
1183 more T's clustered together tend to terminate transcription), or if it spans many known naturally-  
1184 occurring polymorphisms, or has a high number of potential off-targets, discard it.

1185

1186 3- For transcription initiation from U6 promoter, replace the first base of the target with a "G", to give a  
1187 G+(N)19 sequence.

1188

1189 **GCTGAGGGTTGGACAACAGG**

1190

1191 4- Append "GTTTAAGAGCTATGCTGGAAACAG" to the 3' end of the sequence. This entire sequence is  
1192 now the forward primer used to PCR the sgRNA scaffold part of the cassette ("OSO forward" primer)

1193

1194 **GCTGAGGGTTGGACAACAGGGTTTAAGAGCTATGCTGGAAACAG**

1195

1196 5- Copy reverse complement of G+N(19), append "ATCTATACCATCGGATGCCTTC" to the 3' end of this.  
1197 This is now the reverse primer to PCR the U6 promoter part of the cassette ("OSO reverse" primer)

1198

1199 **CCTGTTGTCCAACCCTCAGCATCTATACCATCGGATGCCTTC**

1200 6- Set up a PCR reaction using the following components in the exact amounts described. The  
1201 amounts/concentrations/proportions are critical for the one-step overlap reaction to occur seamlessly.  
1202 Also, it is very important to eliminate all sources of contamination, otherwise you may re-amplify  
1203 sgRNAs already in heavy use in the lab. Template plasmids are available from Addgene  
1204 ([https://www.addgene.org/Lionel\\_Christiaen/](https://www.addgene.org/Lionel_Christiaen/)):  
1205

1206 **For 50 ul reaction:**

1207 1.5 ul 10mM dNTPs  
1208 1 ul 50mM MgSO<sub>4</sub>  
1209 10 ul 10X Pfx Buffer  
1210 1 ul U6>XX plasmid at 15 ng/ul  
1211 1 ul X>sgRNA(F+E) plasmid at 15 ng/ul  
1212 1.5 ul 20 uM U6 forward primer (5'- TGGCGGGTGTATTAACCAC -3')  
1213 1.5 ul 20 uM sgRNA reverse primer (5'- GGATTCCTTACGCGAAATACG -3')  
1214 1 ul **2 uM OSO forward primer** (designed in step 4, or obtained from CRISPOR)  
1215 1 ul **2 uM OSO reverse primer** (designed in step 5, or obtained from CRISPOR)  
1216 30 ul H<sub>2</sub>O  
1217 0.5 ul Pfx platinum

1218  
1219 **PCR program:**

1220 94° - 3'  
1221 94° - 30" |  
1222 50° - 30" | X 30  
1223 68° - 3' |  
1224 68° - 5'

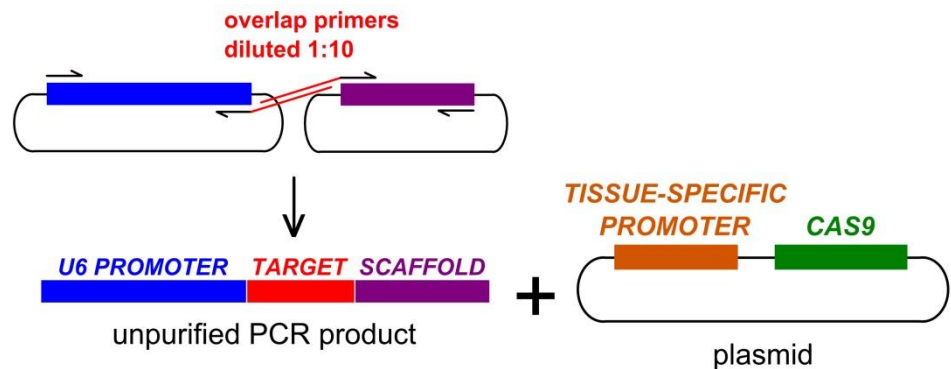

1225  
1226  
1227 The 1:10 dilution of your custom overlap target-specific primers will force the "fusion" of the entire  
1228 cassette later in the reaction, when these primers are depleted from the solution through incorporation  
1229 into the PCR products.

1230  
1231 7- Run 2 ul of the PCR reaction on a gel. There should be a strong band at ~1.2 kbp. If the band is only 1  
1232 kbp, the fusion did not occur. The success rate in our hands is ~94%. If possible, run alongside positive  
1233 control (PCR on verified sgRNA plasmid template using same primers).

1234  
1235 OSO-PCR products can be electroporated as is, un-purified. 25 ul appears to be sufficient to recapitulate  
1236 effects of sgRNAs delivered by traditional plasmid electroporation, but this volume can be adjusted  
1237 accordingly. If you need to clone the cassette into a plasmid, you can use the product as template for  
1238 additional PCRs using the outer primers with added overhangs for restriction enzyme or Clontech In-  
1239 Fusion cloning.

1240
